# Supplementary material
Source: publisher figshare collection journal article supplement (https://gsajournals.figshare.com/articles/dataset/_/16611838)
Supplement: Supplementary file 1 [file 1]

## Sheet: 46_FBvMB_GO_BP
ID	GO:0003002	GO:0045165	GO:0001501	GO:0048706	GO:0048705	GO:0007389	GO:0021515	GO:0048663	GO:0048562	GO:0048704	GO:0061448	GO:0007423	GO:0048598	GO:0048665	GO:0021953	GO:0035270	GO:0090596	GO:0051216	GO:0021536	GO:0001708	GO:0021514	GO:0021510	GO:0048568	GO:0000904	GO:0009953	GO:0051962	GO:0050767	GO:0001709	GO:0055080	GO:0042063	GO:0098771	GO:0021513	GO:0050769	GO:0030900	GO:0045664	GO:0021511	GO:0001764	GO:0015844	GO:0061564	GO:0001654	GO:0150063	GO:0043010	GO:0021517	GO:0007409	GO:0050801	GO:0060579	GO:0060581	GO:0055065	GO:0015837
Description	regionalization	cell fate commitment	skeletal system development	embryonic skeletal system development	skeletal system morphogenesis	pattern specification process	cell differentiation in spinal cord	neuron fate commitment	embryonic organ morphogenesis	embryonic skeletal system morphogenesis	connective tissue development	sensory organ development	embryonic morphogenesis	neuron fate specification	central nervous system neuron differentiation	endocrine system development	sensory organ morphogenesis	cartilage development	diencephalon development	cell fate specification	ventral spinal cord interneuron differentiation	spinal cord development	embryonic organ development	cell morphogenesis involved in differentiation	dorsal/ventral pattern formation	positive regulation of nervous system development	regulation of neurogenesis	cell fate determination	cation homeostasis	gliogenesis	inorganic ion homeostasis	spinal cord dorsal/ventral patterning	positive regulation of neurogenesis	forebrain development	regulation of neuron differentiation	spinal cord patterning	neuron migration	monoamine transport	axon development	eye development	visual system development	camera-type eye development	ventral spinal cord development	axonogenesis	ion homeostasis	ventral spinal cord interneuron fate commitment	cell fate commitment involved in pattern specification	metal ion homeostasis	amine transport
GeneRatio	31/297	26/297	37/297	19/297	24/297	32/297	12/297	13/297	24/297	14/297	22/297	33/297	34/297	9/297	18/297	15/297	21/297	18/297	11/297	12/297	6/297	13/297	27/297	37/297	11/297	29/297	38/297	8/297	32/297	19/297	32/297	6/297	26/297	24/297	33/297	6/297	14/297	10/297	28/297	22/297	22/297	20/297	8/297	26/297	33/297	5/297	5/297	29/297	11/297
BgRatio	199/8514	155/8514	316/8514	85/8514	155/8514	266/8514	37/8514	48/8514	187/8514	64/8514	160/8514	330/8514	354/8514	25/8514	116/8514	82/8514	160/8514	124/8514	45/8514	56/8514	8514-11-01	71/8514	275/8514	465/8514	54/8514	320/8514	489/8514	27/8514	379/8514	161/8514	384/8514	14/8514	279/8514	246/8514	407/8514	15/8514	98/8514	50/8514	322/8514	221/8514	221/8514	189/8514	32/8514	293/8514	423/8514	8514-10-01	8514-10-01	348/8514	64/8514
pvalue	1.42202e-12	1.80429e-11	5.8992e-11	6.10882e-11	6.18662e-10	6.49563e-10	2.20757e-09	5.61426e-09	2.84859e-08	2.89345e-08	3.12214e-08	3.79317e-08	6.31502e-08	8.46931e-08	8.92744e-08	1.17082e-07	1.46707e-07	2.5305e-07	2.72457e-07	3.66937e-07	6.83172e-07	8.21084e-07	1.02e-06	1.85828e-06	1.9411e-06	2.0818e-06	2.3653e-06	2.48385e-06	2.80865e-06	3.00306e-06	3.71495e-06	4.06259e-06	4.32643e-06	4.65923e-06	4.69695e-06	6.57333e-06	6.77092e-06	6.82669e-06	6.99612e-06	8.50551e-06	8.50551e-06	8.87398e-06	1.01052e-05	1.05254e-05	1.06565e-05	1.08998e-05	1.08998e-05	1.0901e-05	1.10479e-05
p.adjust	4.69123e-09	2.97618e-08	5.03825e-08	5.03825e-08	3.57152e-07	3.57152e-07	1.0404e-06	2.31518e-06	9.36359e-06	9.36359e-06	9.36359e-06	1.04281e-05	1.60256e-05	1.96344e-05	1.96344e-05	2.41408e-05	2.84697e-05	4.63784e-05	4.73071e-05	6.05263e-05	0.000107323	0.000123125	0.000146303	0.000255437	0.000256148	0.000264149	0.000289004	0.00029265	0.000319508	0.000330237	0.000395342	0.000418827	0.000432512	0.000442721	0.000442721	0.0005918	0.0005918	0.0005918	0.0005918	0.000684382	0.000684382	0.00069703	0.000743819	0.000743819	0.000743819	0.000743819	0.000743819	0.000743819	0.000743819
qvalue	3.77957e-09	2.39781e-08	4.05915e-08	4.05915e-08	2.87745e-07	2.87745e-07	8.38213e-07	1.86526e-06	7.54394e-06	7.54394e-06	7.54394e-06	8.40154e-06	1.29113e-05	1.58188e-05	1.58188e-05	1.94494e-05	2.29371e-05	3.73656e-05	3.81138e-05	4.8764e-05	8.64667e-05	9.91979e-05	0.000117871	0.000205797	0.00020637	0.000212816	0.000232841	0.000235779	0.000257417	0.000266061	0.000318514	0.000337435	0.000348461	0.000356686	0.000356686	0.000476793	0.000476793	0.000476793	0.000476793	0.000551384	0.000551384	0.000561574	0.000599271	0.000599271	0.000599271	0.000599271	0.000599271	0.000599271	0.000599271
Genes	CYP26B1	BARHL2	CHADL	FGF9	COL14A1	CYP26B1	DBX1	DBX1	RIPOR2	HOXA3	CHADL	COL8A2	CYP26B1	DBX1	DBX1	CDH1	COL8A2	CHADL	CDH1	DBX1	DBX1	DBX1	RIPOR2	BARHL2	DBX1	FOXA1	BARHL2	BARHL2	CORIN	APCDD1	CORIN	DBX1	FOXA1	CDH1	BARHL2	DBX1	BARHL1	DRD4	BARHL2	COL8A2	COL8A2	COL8A2	DBX1	BARHL2	CORIN	DBX1	DBX1	CORIN	DRD4
	DBX1	CYP26B1	COL14A1	HOXA3	COMP	DBX1	DMRT3	DMRT3	FBN2	HOXA5	COL14A1	CYP26B1	RIPOR2	DMRT3	DMRT3	FOXA2	CYP26B1	COL14A1	FOXB1	DMRT3	DMRT3	DMRT3	FBN2	CDHR1	DMRT3	GATA2	DIO3	CYP26B1	ATP12A	EGR2	ATP12A	DMRT3	GATA2	EFNA2	DIO3	DMRT3	BARHL2	OXT	EFNA2	DIO3	DIO3	DIO3	DMRT3	EFNA2	ATP12A	DMRT3	DMRT3	ATP12A	OXT
	DMRT3	DBX1	COMP	HOXA5	CYP26B1	DMRT3	GATA2	ESRP1	FGF9	HOXB2	COMP	DIO3	FBN2	ESRP1	GATA2	GATA2	DIO3	COMP	GATA2	ESRP1	GATA2	FOXB1	FGF9	CLDN3	FOXA1	GSX2	ESRP1	EBF2	ATP2A1	ERBB3	ATP2A1	NKX6-2	GSX2	FOXB1	ESRP1	NKX6-2	GATA2	SLC6A4	SHC3	FBN2	FBN2	FBN2	GATA2	SHC3	ATP2A1	NKX6-2	NKX6-2	ATP2A1	SYT6
	EGR2	DMRT3	CYP26B1	HOXB2	FBN2	EGR2	GSX2	FOXA1	GATA2	HOXB3	EBF2	ESRP1	FGF9	FOXA1	GSX2	GATA3	RIPOR2	FGF9	GSX1	FOXA1	NKX6-2	GATA2	GATA2	COL14A1	GSX2	HGF	FOXA1	GATA2	ATP2A3	GCM1	ATP2A3	NKX6-1	HGF	GATA2	FOXA1	NKX6-1	GATA3	SYT6	EGR2	FGF9	FGF9	GATA3	LHX1	EGR2	ATP2A3	NKX6-1	NKX6-1	ATP2A3	ADRA2C
	FOXA1	EBF2	FBN2	HOXB3	HOXA3	FOXA1	LHX5	GATA2	GATA3	HOXB5	FGF9	RIPOR2	FOXA2	GSX2	GABRB1	HOXA3	FBN2	HOXA3	CNTNAP2	FOXA2	NKX6-1	GSX2	GATA3	EFNA2	HOXB2	HOXD3	GATA2	GATA3	CCL19	GSX2	CCL19	SHH	HOXD3	GSX2	GATA2	SHH	LHX1	ADRA2C	EMB	GATA3	GATA3	IRX5	NKX6-2	EMB	CCL19	SOX1	SOX1	CCL19	SYT1
	FOXA2	ESRP1	FGF9	HOXB5	HOXA5	FOXA2	LHX1	GSX2	HOXA3	HOXC9	FOXA1	FBN2	GATA2	ATOH1	LHX5	HOXA5	FGF9	HOXA5	NKX2-6	GSX2	SOX1	LHX5	GCM1	SHC3	LHX1	IRX3	GATA3	ATOH1	DRD4	MAG	DRD4	SOX1	IRX3	LHX5	GATA3	SOX1	LHX6	SYT1	FOXB1	IRX5	IRX5	LHX1	NKX6-1	FOXB1	DCN			DRD4	P2RY1
	FOXB1	FOXA1	HOXA3	HOXC6	HOXB2	FOXB1	GSX1	TBR1	HOXA5	HOXD3	FOXD1	FGF9	GATA3	NKX6-2	LHX1	HOXB3	GATA2	HOXB3	NR4A2	ATOH1		LHX1	HOXA3	EGR2	SP8	LHX5	GSX2	POU6F2	GATA2	LAMB2	GATA2		MAG	LHX1	CTTN		ATOH1	P2RY1	FOXD1	LHX1	LHX1	NINJ1	SHH	FOXD1	DRD4			GATA2	RGS2
	FOXD1	FOXA2	HOXA5	HOXC9	HOXB3	FOXD1	NKX6-2	ATOH1	HOXB2	IRX5	HOXA3	GABRB3	GCM1	NKX6-1	LHX6	HOXD3	GATA3	HOXD3	PITX2	NKX6-2		GSX1	HOXA5	EMB	NKX6-2	LHX1	CTTN	MEF2C	GRM1	MATN2	GRM1		NEUROD2	LHX6	HGF		CCKAR	SNCG	GATA3	NINJ1	NINJ1	BCAR3	SOX1	GATA3	GATA2			GRM1	RHCG
	GSX2	GATA2	HOXB2	HOXD1	HOXB5	GSX2	NKX6-1	GSX1	HOXB3	LHX1	HOXA5	GATA2	HOXA3	SOX1	TBR1	GSX1	IRX5	SULF1	SHH	NKX6-1		NKX6-2	HOXB2	RIPOR2	NKX6-1	MAG	HGF		HOXA3	NKX6-2	HOXA3		ATOH1	TBR1	HOXD3		MATN2	SYT2	CTTN	BCAR3	BCAR3	SLC4A5		CTTN	GRM1			HOXA3	SNCG
	HOXA3	GATA3	HOXB3	HOXD3	HOXC9	HOXA3	SHH	NKX6-2	HOXB5	HOXC4	HOXB3	GATA3	HOXA5		GSX1	NKX6-2	LHX1	BARX2	SOX2	SHH		NKX6-1	HOXB3	FOXB1	SHH	NEUROD2	HOXB3		KCNJ2	NKX6-1	KCNJ2		EPHA3	PAX5	IRX3		MEF2C	VIP	LHX1	SLC4A5	SLC4A5	LAMB2		LHX1	HOXA3			KCNJ2	SYT2
	HOXA5	GCM1	HOXB5	IRX5	HOXD3	HOXA5	SOX1	NKX6-1	HOXC9	PAX5	HOXD3	IRX5	HOXB2		NKX6-2	NKX6-1	BCAR3	HOXC4	TAL2	SOX2		SHH	HOXB5	FOXD1	SOX1	OXT	HOXD3		RYR1	P2RY1	RYR1		ADRA2C	ATOH1	KANK1		NKX6-1		LHX9	LAMB2	LAMB2	MAB21L2		LHX9	KCNJ2			RYR1	VIP
	HOXB2	GSX2	HOXC6	LHX1	IRX5	HOXB2	TAL1	SHH	HOXD3	SHOX2	SULF1	LHX1	HOXB3		NKX6-1	PAX8	ATOH1	SHOX2		SOX1		SOX1	HOXC9	GATA3		ATOH1	IRX3		EPB42	PRKCH	EPB42		SYT1	GSX1	MAG		NR4A2		MAG	MAB21L2	MAB21L2	MFRP		MAG	RYR1			EPB42
	HOXB3	TCF7L2	HOXC9	SULF1	LHX1	HOXB3		SOX1	IRX5	HOXA6	BARX2	NINJ1	HOXB5		NR4A2	PITX2	MFRP	COL12A1				TAL1	HOXD3	CTTN		EPHA3	KANK1		JPH2	PTK2B	JPH2		RUFY3	POU3F3	NEUROD2		NSMF		TNC	MFRP	MFRP	MYOM1		TBR1	EPB42			JPH2
	HOXB5	TBR1	HOXD1	HOXC4	BARX2	HOXB5			LHX1	MEF2C	HOXC4	PRDM16	HOXC9		POU3F4	SHH	PAX8	LUM					IRX5	KANK1		ADRA2C	MAG		OXT	ROR2	OXT		SHOX2	CCKAR	TBR1		SOX1		TBR1	MYOM1	MYOM1	PITX2		ATOH1	JPH2			OXT
	HOXC6	ATOH1	HOXD3	PAX5	HOXC4	HOXC6			HOXC4		SHOX2	BCAR3	HOXD3		SHH	SOX2	PITX2	MATN2					LHX1	LHX1		SYT1	NEUROD2		SFXN5	SHH	SFXN5		MEF2C	CNTNAP2	ATOH1				ATOH1	PITX2	PITX2	POU4F2		CCKAR	OXT			SFXN5
	HOXC9	GSX1	IRX5	SHOX2	PAX5	HOXC9			PAX5		COL12A1	ATOH1	IRX3		SOX1		POU3F4	MEF2C					HOXC4	LHX9		RUFY3	TBR1		ITPR3	SLC45A3	ITPR3		NKX6-2	NKX2-6	SLC6A4				EPHA3	POU4F2	POU4F2	RPE65		RUFY3	SFXN5			ITPR3
	HOXD3	IL23R	LHX1	HOXA6	FREM1	HOXD3			ATOH1		LUM	SLC4A5	IRX5		TAL1		ROR2	ROR2					PAX5	MAG		SHOX2	ATOH1		SLC4A5	SOX2	SLC4A5		NKX6-1	NR4A2	EPHA3				CCKAR	RPE65	RPE65	SHH		NEFH	ITPR3			TRPM7
	IRX3	POU6F2	SULF1	MEF2C	SHOX2	IRX4			SHOX2		MATN2	LAMB2	LHX1		NFIB		RPE65	NFIB					ATOH1	TBR1		MEF2C	SLC6A4		TRPM7	TAL1	TRPM7		NSMF	PITX2	ADRA2C				RUFY3	SHH	SHH	SOX1		LAMB2	SLC4A5			SLC12A9
	LHX1	MEF2C	BARX2	SHH	COL12A1	IRX3			HOXA6		MEF2C	MAB21L2	SULF1				SOX1						SHOX2	ATOH1		NKX6-2	EPHA3		SLC12A9	NFIB	SLC12A9		POU4F2	POU3F4	SYT1				NEFH	SOX2	SOX2	TFAP2B		SHOX2	TRPM7			NMB
	HOXC4	NKX6-2	RYR1		HOXA6	LHX1			MEF2C		POU4F2	MFRP	HOXC4				TFAP2B						HOXA6	CCKAR		NKX6-1	ADRA2C		NMB		NMB		PRKCH	SHH	RUFY3				LAMB2	SOX1	SOX1	THY1		MATN2	SLC12A9			P2RY1
	TBR1	NKX6-1	HOXC4		MATN2	HOXC4			PAX8		ROR2	MYOM1	PAX5				THY1						MEF2C	RUFY3		NSMF	SYT1		P2RY1		P2RY1		PTK2B	SOX2	SHOX2				SHOX2	TFAP2B	TFAP2B			NKX6-1	NMB			PLCG2
	SP8	ROR2	PAX5		MEF2C	TBR1			POU3F4		NFIB	NKX2-6	ATOH1										NKX2-6	NEFH		POU4F2	RUFY3		PLCG2		PLCG2		RGS2	SOX1	MEF2C				MATN2	THY1	THY1			NR4A2	P2RY1			PTK2B
	HOXA6	SHH	FREM1		ROR2	SP8			ROR2			PAX8	SHOX2										PAX8	LAMB2		PRKCH	SHOX2		PTK2B		PTK2B		SHH	TAL2	NKX6-1				NKX6-1					POU4F2	PLCG2			PTPN6
	MEF2C	SOX2	SHOX		SP5	HOXA6			SHH			PITX2	COL12A1										POU3F4	SHOX2		PTK2B	MEF2C		PTPN6		PTPN6		SYT2	NFIB	NSMF				NR4A2					SHH	PTK2B			SCGN
	NKX6-2	SOX1	SHOX2			MEF2C						POU3F4	SP8										ROR2	COL12A1		RGS2	NKX6-2		RHCG		RHCG		TCF4		POU4F2				POU4F2					THY1	PTPN6			SLC41A1
	NKX6-1	TAL1	COL12A1			NKX6-2						POU4F2	HOXA6										SHH	MATN2		SHH	NKX6-1		SCGN		SCGN		ZNF804A		PTK2B				SHH					NFIB	RHCG			TFAP2B
	PAX8		HOXA6			NKX6-1						ROR2	MAB21L2										TAL1	MEF2C		SYT2	NSMF		SLC41A1		SLC41A1				RGS2				THY1						SCGN			THY1
	PITX2		LUM			PAX8						RPE65	MEF2C											NKX6-1		TCF4	POU4F2		SLC4A4		SLC4A4				SHH				NFIB						SLC41A1			TRPA1
	ROR2		MATN2			PITX2						SHH	PAX8											NR4A2		ZNF804A	PRKCH		TFAP2B		TFAP2B				SOX2										SLC4A4			LETM1
	SHH		MEF2C			ROR2						SOX2	POU3F4											NSMF			PTK2B		THY1		THY1				SYT2										TFAP2B
	SOX1		PITX2			SHH						SOX1	ROR2											OLFM4			RGS2		TRPA1		TRPA1				THY1										THY1
			PTPN6			SOX1						TFAP2B	SHH											POU4F2			SHH		LETM1		LETM1				TCF4										TRPA1
			ROR2									THY1	SOX2											PTPN6			SLC45A3								ZNF804A										LETM1
			SHH										TAL1											SHH			SOX2
			SP5																					TAL1			SYT2
			TAL1																					THY1			THY1
			NFIB																					NFIB			TCF4
																											ZNF804A
[truncated: 68 more columns]

## Sheet: 46_FBvHB_GO_BP
ID	GO:0003002	GO:0007389	GO:0021953	GO:0045165	GO:0048598	GO:0021515	GO:0050767	GO:0048663	GO:0001764	GO:0021510	GO:0048562	GO:0045596	GO:0045664	GO:0043269	GO:0048706	GO:0021517	GO:0048665	GO:0007423	GO:0007420	GO:0009952	GO:0009953	GO:0051962	GO:0001709	GO:0030900	GO:0090596	GO:0048667	GO:0000904	GO:0010721	GO:0060322	GO:0048568	GO:0003407	GO:0021871	GO:0048704	GO:0032990	GO:0048469	GO:0050768	GO:0021872	GO:0021879	GO:0048858	GO:0120039	GO:0001708	GO:0035270	GO:0050769	GO:0051961	GO:0048812	GO:0007409	GO:0001501	GO:0045665	GO:0007610
Description	regionalization	pattern specification process	central nervous system neuron differentiation	cell fate commitment	embryonic morphogenesis	cell differentiation in spinal cord	regulation of neurogenesis	neuron fate commitment	neuron migration	spinal cord development	embryonic organ morphogenesis	negative regulation of cell differentiation	regulation of neuron differentiation	regulation of ion transport	embryonic skeletal system development	ventral spinal cord development	neuron fate specification	sensory organ development	brain development	anterior/posterior pattern specification	dorsal/ventral pattern formation	positive regulation of nervous system development	cell fate determination	forebrain development	sensory organ morphogenesis	cell morphogenesis involved in neuron differentiation	cell morphogenesis involved in differentiation	negative regulation of cell development	head development	embryonic organ development	neural retina development	forebrain regionalization	embryonic skeletal system morphogenesis	cell part morphogenesis	cell maturation	negative regulation of neurogenesis	forebrain generation of neurons	forebrain neuron differentiation	cell projection morphogenesis	plasma membrane bounded cell projection morphogenesis	cell fate specification	endocrine system development	positive regulation of neurogenesis	negative regulation of nervous system development	neuron projection morphogenesis	axonogenesis	skeletal system development	negative regulation of neuron differentiation	behavior
GeneRatio	33/222	36/222	24/222	27/222	37/222	13/222	42/222	14/222	18/222	15/222	23/222	34/222	34/222	32/222	15/222	10/222	9/222	29/222	35/222	17/222	12/222	28/222	9/222	24/222	19/222	30/222	34/222	21/222	35/222	25/222	10/222	7/222	12/222	32/222	14/222	19/222	10/222	9/222	31/222	31/222	11/222	13/222	24/222	19/222	30/222	24/222	25/222	16/222	27/222
BgRatio	199/8514	266/8514	116/8514	155/8514	354/8514	37/8514	489/8514	48/8514	98/8514	71/8514	187/8514	403/8514	407/8514	373/8514	85/8514	32/8514	25/8514	330/8514	461/8514	118/8514	54/8514	320/8514	27/8514	246/8514	160/8514	374/8514	465/8514	197/8514	491/8514	275/8514	41/8514	16/8514	64/8514	433/8514	93/8514	174/8514	44/8514	34/8514	424/8514	424/8514	56/8514	82/8514	279/8514	183/8514	416/8514	293/8514	316/8514	140/8514	362/8514
pvalue	6.14731e-18	1.51274e-16	1.50872e-15	2.21363e-15	2.38277e-13	3.71855e-12	3.7486e-12	9.8206e-12	5.06677e-11	2.74112e-10	4.71509e-10	9.12778e-10	1.18399e-09	2.00025e-09	3.89941e-09	4.63448e-09	6.73712e-09	7.18426e-09	8.23973e-09	8.75663e-09	9.5834e-09	1.4723e-08	1.47684e-08	2.13308e-08	2.96391e-08	3.18091e-08	3.54944e-08	3.69176e-08	4.13005e-08	4.38682e-08	6.55579e-08	6.986e-08	7.28913e-08	7.36392e-08	1.06801e-07	1.15846e-07	1.35481e-07	1.40962e-07	1.53785e-07	1.53785e-07	1.56941e-07	1.64874e-07	2.35858e-07	2.58362e-07	3.36082e-07	5.81611e-07	6.40653e-07	6.47748e-07	7.13294e-07
p.adjust	1.79194e-14	2.20481e-13	1.46597e-12	1.61318e-12	1.38915e-10	1.56103e-09	1.56103e-09	3.57838e-09	1.64107e-08	7.99037e-08	1.2495e-07	2.21729e-07	2.65487e-07	4.16481e-07	7.57785e-07	8.44344e-07	1.15522e-06	1.16345e-06	1.26415e-06	1.27628e-06	1.33027e-06	1.87173e-06	1.87173e-06	2.5908e-06	3.45592e-06	3.56629e-06	3.83208e-06	3.84339e-06	4.15141e-06	4.26252e-06	6.16456e-06	6.31348e-06	6.31348e-06	6.31348e-06	8.895e-06	9.38028e-06	1.06737e-05	1.08133e-05	1.11581e-05	1.11581e-05	1.11581e-05	1.1443e-05	1.5989e-05	1.71165e-05	2.17706e-05	3.68564e-05	3.93372e-05	3.93372e-05	4.24337e-05
qvalue	1.443e-14	1.77548e-13	1.18051e-12	1.29905e-12	1.11865e-10	1.25705e-09	1.25705e-09	2.88157e-09	1.32151e-08	6.43442e-08	1.00619e-07	1.78552e-07	2.13789e-07	3.35381e-07	6.10223e-07	6.79926e-07	9.30265e-07	9.36895e-07	1.01798e-06	1.02775e-06	1.07123e-06	1.50725e-06	1.50725e-06	2.0863e-06	2.78295e-06	2.87183e-06	3.08586e-06	3.09497e-06	3.34302e-06	3.43249e-06	4.96415e-06	5.08407e-06	5.08407e-06	5.08407e-06	7.16289e-06	7.55368e-06	8.59526e-06	8.70766e-06	8.9853e-06	8.9853e-06	8.9853e-06	9.21474e-06	1.28755e-05	1.37834e-05	1.75313e-05	2.96794e-05	3.16771e-05	3.16771e-05	3.41707e-05
Genes	CYP26B1	CYP26B1	DLL4	CYP26B1	CRABP2	DLL4	BCL11A	DLL4	BARHL1	DLL4	RIPOR2	BCL11A	BCL11A	AVP	HOXA2	DLL4	DMRTA2	ACHE	BARHL1	DLL3	DLL4	CRABP2	CYP26B1	DMRTA2	CYP26B1	CDHR1	CDHR1	BCL11A	BARHL1	RIPOR2	DIO3	DMRTA2	HOXA2	BCL11A	BCL11A	BCL11A	GATA2	GATA2	BCL11A	BCL11A	DMRTA2	FOXA2	CRABP2	BCL11A	BCL11A	CRABP2	CYP26B1	BCL11A	AVP
	DLL4	DLL4	EMX1	DLL4	CYP26B1	GATA2	CRABP2	DMRTA2	FEZF1	FOXB1	FZD5	C1QL4	CRABP2	CLIC6	HOXA3	GATA2	GSX2	CYP26B1	DMRTA2	FEZF1	GSX2	DMRTA2	EBF2	EMX1	DIO3	CRABP2	CRABP2	DIO3	DMRTA2	FZD5	DLL4	EMX1	HOXA3	CRABP2	FZD5	DIO3	GSX2	GSX2	CRABP2	CRABP2	FOXA2	GATA2	DMRTA2	DIO3	CRABP2	EMB	DLL3	DIO3	BRS3
	DLL3	DLL3	GATA2	DMRTA2	DLL4	GSX2	DIO3	GATA2	GATA2	GATA2	GATA2	CMTM5	DIO3	HOMER2	HOXA5	LHX1	LBX1	DIO3	EMX1	FOXA2	HOXA2	FEZF1	GATA2	FEZF1	RIPOR2	EMB	EMB	DLL3	EMX1	GATA2	IRX5	FEZF1	HOXA5	EMB	GATA2	DLL3	LHX5	LHX5	EMB	EMB	GSX2	GATA3	FEZF1	DLL3	EMB	FEZF1	HOXA2	HOXA2	FOXA2
	DMRTA2	DMRTA2	GSX2	EBF2	RIPOR2	LHX5	DLL3	GSX2	GATA3	GSX2	GATA3	DIO3	FEZF1	HOXA3	HOXB2	LBX1	ATOH1	DLL4	FEZF1	FOXB1	HOXB2	FZD4	GATA3	FOXB1	FZD5	RIPOR2	RIPOR2	HOXA2	FEZF1	GATA3	LHX1	GSX2	HOXB2	EMX1	GATA3	HOXA2	LHX6	LHX6	EMX1	EMX1	LBX1	HOXA3	FZD4	HOXA2	EMX1	FOXB1	HOXA3	IRX3	FOXB1
	EMX1	EMX1	LHX5	FOXA2	FOXA2	LHX1	DMRTA2	LBX1	LHX1	LHX5	HOXA2	DLL3	FZD4	KCNA3	HOXD3	LHX4	NKX6-1	RIPOR2	FOXB1	FZD5	LHX1	GATA2	HOXA2	GATA2	GATA2	FEZF1	FEZF1	IRX3	FOXB1	HOXA2	DLX1	LHX1	HOXD3	FEZF1	HOXA5	IRX3	DLX1	DLX1	FEZF1	FEZF1	ATOH1	HOXA5	GATA2	IRX3	FEZF1	FOXD1	HOXA5	KANK1	FZD4
	FEZF1	FEZF1	LHX1	GATA2	FZD5	LBX1	EMX1	DLX1	LHX6	LHX1	HOXA3	FOXA2	GATA2	KCNAB3	HOXC4	NKX6-1	NKX6-2	FZD4	FOXG1	HOXA2	SP8	GSX2	LBX1	GSX2	GATA3	FOXB1	FOXB1	KANK1	FOXG1	HOXA3	POU4F2	FEZF2	HOXC4	FOXB1	IRX5	KANK1	TBR1	TBR1	FOXB1	FOXB1	NKX6-1	HOXD3	GSX2	KANK1	FOXB1	GATA3	HOXB2	LBX1	GLRA1
	FOXA2	FOXA2	LHX6	GATA3	GATA2	LHX4	FERD3L	TBR1	ATOH1	LBX1	HOXA5	GATA2	GATA3	KCNC3	HOXC5	NKX6-2	OLIG3	FZD5	FZD4	HOXA3	SFRP1	HGF	ATOH1	LHX5	HOXA2	FOXD1	FOXD1	LBX1	FZD4	HOXA5	RPE65	SIX3	HOXD4	FOXD1	LHX6	LBX1	OTP	OTP	FOXD1	FOXD1	NKX6-2	ONECUT1	HGF	LBX1	FOXD1	HOXA2	HOXD3	DLX1	GRP
	FOXB1	FOXB1	LBX1	GSX2	GATA3	NKX6-1	FEZF1	ATOH1	CAMK2A	NEFL	HOXB2	GATA3	HGF	KCNF1	HOXD4	OLIG3	SOX1	GATA2	GATA2	HOXA5	NKX6-1	HOXD3	FEZF2	LHX1	IRX5	GATA3	FZD4	DLX1	GATA2	HOXB2	SIX3		IRX5	FZD4	NPPC	DLX1	FEZF2	FEZF2	FZD4	FZD4	OLIG3	OTP	HOXD3	DLX1	FZD4	ISLR2	HOXC4	FEZF2	HOMER2
	FOXD1	FOXD1	DLX1	HOXA2	HOXA2	NKX6-2	FZD4	FEZF2	FEZF2	LHX4	HOXD3	HOXA2	HOXA2	KCNIP4	IRX5	SOX1	TLX3	GATA3	GSX2	HOXB2	NKX6-2	IRX3	MEF2C	LHX6	LHX1	HOXA2	GATA3	NPPC	GSX2	HOXD3	TFAP2B		LHX1	GATA3	CNTNAP2	FEZF2	NR2E1	SOX1	GATA3	GATA3	SOX2	PAX8	IRX3	FEZF2	GATA3	LHX1	HOXC5	MEIS1	KCNJ10
	FZD5	FZD5	TBR1	LBX1	HOXA3	OLIG3	GATA2	NKX6-1	MEF2C	NKX6-1	HOXC4	HOXA5	HOXD3	KCNJ10	LHX1	TBX20		HOXA2	HOXA2	HOXD3	SIX3	ISLR2		DLX1	CTHRC1	ISLR2	HOXA2	FEZF2	HOXA2	HOXC4	THY1		PAX5	HOXA2	NKX6-1	MEIS1	SOX1		HOXA2	HOXA2	SOX1	NKX6-1	ISLR2	MEIS1	HOXA2	GFRA1	HOXD4	NR2E1	GRIN2A
	GSX2	GSX2	OTP	ONECUT1	HOXA5	SOX1	GATA3	NKX6-2	NKX6-1	NKX6-2	HOXD4	IRX3	IRX3	KCNJ13	SULF1			IRX5	HOXB2	HOXC4	SOX1	LHX5		TBR1	ATOH1	LHX1	ISLR2	MEIS1	HOXB2	HOXD4			SHOX2	ISLR2	NR4A2	NKX6-1			ISLR2	ISLR2	TLX3	NKX6-2	DLX1	NKX6-1	ISLR2	TBR1	IRX5	PHOX2B	NPTX2
	HOXA2	HOXA2	SFRP1	DLX1	HOXB2	TAL1	GSX2	OLIG3	NR4A2	OLIG3	IRX5	KANK1	ISLR2	SCN4B	DLX1			LHX1	LHX5	HOXC5	TBX20	LHX1		PAX5	PAX8	GFRA1	KANK1	NKX6-1	LHX5	IRX5			MEF2C	KANK1	PTK2B	NKX6-2			KANK1	KANK1		SIX3	ATOH1	NKX6-2	LHX1	ATOH1	LHX1	POU4F2	TBR1
	HOXA3	HOXA3	LHX4	TBR1	HOXD3	TBX20	HGF	SOX1	NSMF	SOX1	LHX1	LBX1	KANK1	KCNK13	PAX5			CTHRC1	LHX1	HOXD4		DLX1		ATOH1	CLRN1	TBR1	LHX1	NKX6-2	LHX1	LHX1				LHX1	SIX3	NR2E1			LHX1	LHX1		SOX2	OTP	NR2E1	GFRA1	NEFH	SULF1	SIX3	PAX5
	HOXA5	HOXA5	FEZF2	ATOH1	HOXC4		HOXA2	TLX3	OLIG3	TAL1	CTHRC1	LBH	LBX1	OXT	SHOX2			DLX1	LHX6	LHX1		OXT		OTP	MEIS1	ATOH1	GFRA1	NR2E1	LHX6	CTHRC1				GFRA1	TAL1	PHOX2B			GFRA1	GFRA1			NEFL	PHOX2B	TBR1	SLIT3	DLX1	SOX2	OXT
	HOXB2	HOXB2	NKX6-1	SOX5	HOXD4		HOXD3		PHOX2B	TBX20	LBX1	DLX1	DLX1	SCN8A	MEF2C			ATOH1	GRIN2A	SFRP1		ATOH1		NEFL	RPE65	NEFH	TBR1	PHOX2B	GRIN2A	LBX1				TBR1		POU4F2			TBR1	TBR1			FEZF2	POU4F2	ATOH1	NEFL	PAX5	THY1	CARTPT
	HOXD3	HOXD3	NKX6-2	SFRP1	IRX3		IRX3		SOX1		PAX5	NPPC	TBR1	KCNIP3				PAX8	DLX1	FEZF2		OTP		FEZF2	SIX3	SLIT3	ATOH1	POU4F2	DLX1	PAX5				ATOH1		SIX3			ATOH1	ATOH1			SHOX2	SIX3	NEFH	LHX4	NPPC	TLX3	NPAS4
	HOXC4	HOXC4	NR2E1	FEZF2	IRX5		ISLR2		TBX20		ATOH1	CARTPT	ATOH1	CAMK2A				CLRN1	TBR1	SIX3		NEFL		CNTNAP2	SOX1	CAMK2A	NEFH	RGS2	TBR1	ATOH1				NEFH		SOX2			NEFH	NEFH			MEF2C	SOX2	SLIT3	FEZF2	SHOX		FEZF2
	HOXC5	HOXC5	NR4A2	MEF2C	ITGA7		KANK1		TLX3		PAX8	SFRP1	NEFL	HRH3				MAB21L2	PAX5			FEZF2		NKX2-6	TFAP2B	NEFL	SLIT3	SIX3	PAX5	PAX8				SLIT3		THY1			SLIT3	SLIT3			NKX6-1	THY1	CAMK2A	SHOX2	SOX5		CNTNAP2
	HOXD4	HOXD4	OLIG3	NKX6-1	LHX1		LBX1				SHOX2	FEZF2	SFRP1	SYT13				MEIS1	ATOH1			SHOX2		NR2E1	THY1	LHX4	CAMK2A	SOX2	ATOH1	SHOX2				CAMK2A		TLX3			CAMK2A	CAMK2A			NKX6-2	TLX3	NEFL	NKX6-1	SFRP1		MEF2C
	IRX3	IRX4	PHOX2B	NKX6-2	SULF1		DLX1				CLRN1	MEIS1	FEZF2	KCNJ4				NKX2-6	OTP			MEF2C		NR4A2		FEZF2	NEFL	THY1	OTP	CLRN1				NEFL					NEFL	NEFL			NSMF		LHX4	NR2E1	SHOX2		MEIS1
	LHX1	IRX3	RORA	NR2E1	CTHRC1		TBR1				MEF2C	NKX6-1	SHOX2	CACNA1E				NR2E1	NEFL			NKX6-1		SIX3		SHOX2	LHX4	TLX3	NEFL	MEF2C				LHX4					LHX4	LHX4			PHOX2B		FEZF2	NR4A2	MEF2C		NR2E1
	DLX1	LHX1	SOX1	OLIG3	LBX1		ATOH1				SIX3	NKX6-2	MEF2C	KCNH8				PHOX2B	SFRP1			NKX6-2		SOX2		CLRN1	FEZF2		SFRP1	NKX2-6				FEZF2					FEZF2	FEZF2			POU4F2		SHOX2	PHOX2B	MEIS1		NR4A2
	TBR1	LBX1	TAL1	RORA	SP8		OTP				TBX20	NR2E1	MEIS1	MEF2C				POU4F2	FEZF2			NSMF		SOX1		MEF2C	SHOX2		FEZF2	SIX3				SHOX2					SHOX2	SHOX2			PTK2B		CNTNAP2	POU4F2	PLS3		P2RY1
	SP8	DLX1	TBX20	SOX2	PAX5		CAMK2A					PHOX2B	NKX6-1	P2RY1				RPE65	CNTNAP2			PHOX2B		TAL2		NKX6-1	CLRN1		CNTNAP2	TAL1				CNTNAP2					CNTNAP2	CNTNAP2			RGS2		NKX6-1	THY1	STC1		SIX3
	SFRP1	TBR1		SOX1	ATOH1		NEFL					POU4F2	NR2E1	PTK2B				SIX3	MBP			POU4F2				NR2E1	MEF2C		MBP	TBX20				PANK2					NKX6-1	NKX6-1					NR2E1		TAL1		SNCG
	PAX8	SP8		TAL1	SFRP1		SFRP1					PRDM6	NSMF	REM2				SOX2	NKX2-6			PTK2B				NR4A2	NKX6-1		NKX2-6					NKX6-1					NR2E1	NR2E1					NR4A2				TAL1
	FEZF2	SFRP1		TLX3	PAX8		FEZF2					PTK2B	PHOX2B	RGS2				SOX1	NR2E1			RGS2				NSMF	NR2E1		NR2E1					NR2E1					NR4A2	NR4A2					NSMF				VIP
	MEF2C	PAX8			SHOX2		SHOX2					RGS2	POU4F2	SNCG				TFAP2B	NR4A2			TPBG				PHOX2B	NR4A2		NR4A2					NR4A2					NSMF	NSMF					PHOX2B
	NKX6-1	FEZF2			CLRN1		MEF2C					RORA	PTK2B	STC1				THY1	PHOX2B							POU4F2	NSMF		PHOX2B					NSMF					PHOX2B	PHOX2B					POU4F2
	NKX6-2	MEF2C			MAB21L2		MEIS1					SIX3	RGS2	TF					RGS2							THY1	PHOX2B		RGS2					PHOX2B					POU4F2	POU4F2					THY1
	SIX3	NKX6-1			MBP		NKX6-1					SOX2	SIX3	THY1					RORA								POU4F2		RORA					POU4F2					THY1	THY1
	SOX1	NKX6-2			MEF2C		NKX6-2					TAL1	SOX2	VIP					SIX3								STC1		SIX3					THY1
	TBX20	SIX3			SIX3		NR2E1					THY1	THY1						SOX2								TAL1		SOX2
		SOX1			SOX2		NSMF					TLX3	TLX3						SOX1								THY1		SOX1
		STC1			SP9		PHOX2B												TAL2										TAL2
		TBX20			TAL1		POU4F2
					TBX20		PTK2B
							RGS2
							SIX3
							SOX2
							THY1
							TLX3
[truncated: 108 more columns]

## Sheet: 46_FBvSC_GO_BP
ID	GO:0099536	GO:0007268	GO:0098916	GO:0099537	GO:0003002	GO:0007610	GO:0007389	GO:0050767	GO:0044057	GO:0045664	GO:0050804	GO:0099177	GO:0045165	GO:0043269	GO:0048663	GO:0007186	GO:0006836	GO:0051046	GO:0010721	GO:0045596	GO:0050768	GO:0051961	GO:0010817	GO:0021515	GO:0009952	GO:0023061	GO:0048598	GO:0051588	GO:0007620	GO:0021953	GO:1903530	GO:0008015	GO:0030900	GO:0021510	GO:0003013	GO:0045665	GO:0001708	GO:0007420	GO:0007618	GO:0048665	GO:0060322	GO:0001505	GO:0021517	GO:0031644	GO:0007269	GO:0099643	GO:0098655	GO:0061564	GO:0035270
Description	synaptic signaling	chemical synaptic transmission	anterograde trans-synaptic signaling	trans-synaptic signaling	regionalization	behavior	pattern specification process	regulation of neurogenesis	regulation of system process	regulation of neuron differentiation	modulation of chemical synaptic transmission	regulation of trans-synaptic signaling	cell fate commitment	regulation of ion transport	neuron fate commitment	G protein-coupled receptor signaling pathway	neurotransmitter transport	regulation of secretion	negative regulation of cell development	negative regulation of cell differentiation	negative regulation of neurogenesis	negative regulation of nervous system development	regulation of hormone levels	cell differentiation in spinal cord	anterior/posterior pattern specification	signal release	embryonic morphogenesis	regulation of neurotransmitter transport	copulation	central nervous system neuron differentiation	regulation of secretion by cell	blood circulation	forebrain development	spinal cord development	circulatory system process	negative regulation of neuron differentiation	cell fate specification	brain development	mating	neuron fate specification	head development	regulation of neurotransmitter levels	ventral spinal cord development	regulation of neurological system process	neurotransmitter secretion	signal release from synapse	cation transmembrane transport	axon development	endocrine system development
GeneRatio	81/524	80/524	80/524	80/524	52/524	68/524	56/524	79/524	59/524	67/524	52/524	52/524	38/524	63/524	21/524	72/524	39/524	65/524	41/524	63/524	38/524	39/524	53/524	17/524	30/524	50/524	56/524	26/524	10/524	29/524	59/524	48/524	44/524	22/524	48/524	31/524	19/524	64/524	11/524	13/524	66/524	39/524	14/524	22/524	26/524	26/524	63/524	49/524	22/524
BgRatio	425/8514	420/8514	420/8514	423/8514	199/8514	362/8514	266/8514	489/8514	311/8514	407/8514	267/8514	267/8514	155/8514	373/8514	48/8514	468/8514	169/8514	418/8514	197/8514	403/8514	174/8514	183/8514	310/8514	37/8514	118/8514	290/8514	354/8514	94/8514	8514-12-01	116/8514	388/8514	280/8514	246/8514	71/8514	287/8514	140/8514	56/8514	461/8514	17/8514	25/8514	491/8514	218/8514	32/8514	81/8514	111/8514	111/8514	471/8514	322/8514	82/8514
pvalue	5.43797e-21	1.02274e-20	1.02274e-20	1.62699e-20	6.35003e-20	2.47451e-17	1.07313e-16	4.73505e-16	2.45351e-15	4.1761e-14	4.18749e-14	4.18749e-14	7.20689e-14	7.75932e-14	1.1854e-13	1.47027e-13	2.75235e-13	1.57643e-12	2.51769e-12	2.84087e-12	3.48574e-12	4.04061e-12	5.36494e-12	1.01745e-11	1.22568e-11	1.62671e-11	3.21005e-11	3.79643e-11	4.23852e-11	4.24576e-11	4.79813e-11	5.24398e-11	8.35457e-11	1.08764e-10	1.27896e-10	2.51238e-10	3.5878e-10	3.59624e-10	3.82418e-10	4.12503e-10	7.4454e-10	1.03111e-09	1.58819e-09	1.81795e-09	2.01377e-09	2.01377e-09	2.31548e-09	2.32024e-09	2.34421e-09
p.adjust	1.29752e-17	1.29752e-17	1.29752e-17	1.54808e-17	4.83364e-17	1.56967e-14	5.83474e-14	2.2527e-13	1.03756e-12	1.32813e-11	1.32813e-11	1.32813e-11	2.10943e-11	2.10943e-11	3.00776e-11	3.4974e-11	6.16203e-11	3.33328e-10	5.04333e-10	5.40617e-10	6.31748e-10	6.99025e-10	8.8778e-10	1.61351e-09	1.86598e-09	2.38126e-09	4.52498e-09	5.16044e-09	5.38646e-09	5.38646e-09	5.89087e-09	6.23706e-09	9.6356e-09	1.21752e-08	1.39077e-08	2.65614e-08	3.60191e-08	3.60191e-08	3.73201e-08	3.92496e-08	6.91151e-08	9.34383e-08	1.40574e-07	1.57252e-07	1.66618e-07	1.66618e-07	1.7951e-07	1.7951e-07	1.7951e-07
qvalue	1.04248e-17	1.04248e-17	1.04248e-17	1.24379e-17	3.88355e-17	1.26113e-14	4.68787e-14	1.80991e-13	8.33619e-13	1.06708e-11	1.06708e-11	1.06708e-11	1.6948e-11	1.6948e-11	2.41656e-11	2.80995e-11	4.95083e-11	2.67809e-10	4.05202e-10	4.34354e-10	5.07572e-10	5.61625e-10	7.13279e-10	1.29636e-09	1.4992e-09	1.9132e-09	3.63555e-09	4.1461e-09	4.3277e-09	4.3277e-09	4.73296e-09	5.01111e-09	7.74163e-09	9.78204e-09	1.1174e-08	2.13405e-08	2.89392e-08	2.89392e-08	2.99845e-08	3.15348e-08	5.55299e-08	7.50721e-08	1.12942e-07	1.26343e-07	1.33867e-07	1.33867e-07	1.44226e-07	1.44226e-07	1.44226e-07
Genes	ACHE	ACHE	ACHE	ACHE	ALDH1A2	ALDH1A3	ALDH1A2	ADRA2C	ACTN3	ADRA2C	ACHE	ACHE	BARHL2	APOE	DBX1	ADRA2C	APLN	ACHE	APOE	APOE	APOE	APOE	ACHE	DBX1	ALDH1A2	ADRA2C	ALDH1A2	APLN	AVP	DBX1	ACHE	ACTC1	ALDH1A2	DBX1	ACTC1	APOE	DBX1	ALDH1A2	AVP	DBX1	ALDH1A2	ACHE	DBX1	ADRA2C	BAIAP3	BAIAP3	LETM1	APOE	ALDH1A2
	APOE	APOE	APOE	APOE	DBX1	APLN	DBX1	APOE	ADRA2C	APOE	APOE	APOE	DBX1	ATP1A2	DLL4	APLN	AQP1	ADRA2C	BCL11A	BCL11A	BCL11A	BCL11A	ADRA2C	DLL4	DLL3	APLN	ALDH1A3	ATP1A2	AVPR1A	DLL4	ADRA2C	ADRA2C	ALDH1A3	DLL4	ADRA2C	BCL11A	DMRT3	ALDH1A3	AVPR1A	DMRT3	ALDH1A3	ATP1A2	DLL4	AVP	CHRNA5	CHRNA5	AQP1	BARHL2	CDH1
	ATP1A2	ATP1A2	ATP1A2	ATP1A2	DLL4	APOE	DLL4	AVIL	APLN	AVIL	ATP1A2	ATP1A2	DLL4	AVP	DMRT3	APOE	ATP1A2	APLN	COL3A1	CMTM5	COL3A1	COL3A1	ALDH1A2	DMRT3	FEZF1	BAIAP3	APLN	BAIAP3	CNR1	DMRT3	APLN	APLN	AQP1	DMRT3	APLN	DIO3	DMRTA2	AQP1	CNR1	DMRTA2	AQP1	BAIAP3	DMRT3	AVPR1A	CHRNB3	CHRNB3	ATP1A2	CNP	FOXA2
	BAIAP3	BAIAP3	BAIAP3	BAIAP3	DLL3	ATP1A2	DLL3	BARHL2	AQP1	BARHL2	BAIAP3	BAIAP3	DMRT3	AVPR1A	DMRTA2	S1PR4	BAIAP3	AQP1	DIO3	COL3A1	DIO3	DIO3	ALDH1A3	GATA2	FEZF2	CACNA1E	COL11A1	CHRNA5	EDNRB	DRD1	AVP	APOE	AVPR1A	FOXB1	APOE	EDNRB	FOXA1	AVPR1A	DRD1	FOXA1	AVPR1A	CHRNA5	GATA2	CNIH2	CNR1	CNR1	ATP2A1	CNR1	GATA2
	CACNA1E	CACNA1E	CACNA1E	CACNA1E	DMRT3	AVP	DMRT3	BCL11A	ATP1A2	BCL11A	CALB1	CALB1	DMRTA2	CACNA1E	FEZF2	ARHGEF26	CHRNA5	AVP	DLL3	COL5A1	DLL3	DLL3	APLN	GSX2	FOXA2	CAMK2G	COL2A1	CHRNB3	OXT	EMX1	AVPR1A	ATP1A2	CDH1	GATA2	ATP1A2	EFNB2	FOXA2	CDH1	EDNRB	GSX2	CDH1	CHRNB3	ISL1	EDNRB	CPLX1	CPLX1	ATP2A3	CRABP2	GATA3
	CALB1	CALB1	CALB1	CALB1	DMRTA2	AVPR1A	DMRTA2	CHODL	ATP2A1	CHODL	CDH1	CDH1	FEZF2	CAMK2G	FOXA1	AVP	CHRNB3	AVPR1A	EDNRB	DIO3	EDNRB	EDNRB	BACE2	ISL1	FOXB1	CHRNA5	COL5A1	CNR1	SLC6A4	FEZF2	BAIAP3	ATP2A1	CNP	GSX2	ATP2A1	SEMA6D	GSX2	CNP	OXT	ISL1	CNP	CNR1	LHX1	GLRA1	DRD1	DRD1	ATP2B2	CRTAC1	HES1
	CDH1	CDH1	CDH1	CDH1	EMX1	BRS3	EMX1	CNR1	ATP2A3	CNR1	CHRNA5	CHRNA5	FOXA1	CASQ1	GATA2	AVPR1A	CNR1	BAIAP3	EFNB2	DLL3	EFNB2	EFNB2	BAIAP3	LHX5	FZD5	CHRNB3	CRABP2	CPLX1	P2RX1	GATA2	C1QTNF4	ATP2A3	COL3A1	ISL1	ATP2A3	FEZF2	ISL1	COL3A1	SLC6A4	LBX1	COL2A1	COLQ	LBX1	GRM1	KCNC4	KCNC4	CACNA1E	DPYSL2	HOXA3
	CHRNA2	CHRNA2	CHRNA2	CHRNA2	FEZF1	CALB1	FEZF1	COL3A1	ATP2B2	CRABP2	CHRNB3	CHRNB3	FOXA2	CNIH2	GSX2	BAIAP3	CPLX1	C1QTNF4	SEMA6D	EDNRB	SEMA6D	SEMA6D	CACNA1E	LHX1	HES1	CNR1	DLL4	DRD1	OXTR	GSX2	CACNA1E	ATP2B2	CRTAC1	LHX5	ATP2B2	HES1	LBX1	CRTAC1	P2RX1	MYT1L	COL3A1	CPLX1	OLIG2	HGF	CHAT	CHAT	CASQ1	EFNB2	HOXA5
	CHRNA5	CHRNA5	CHRNA5	CHRNA5	FEZF2	CHRNA5	FEZF2	CRABP2	AVP	DIO3	CNIH2	CNIH2	GATA2	CNR1	HES1	BDKRB2	DRD1	CACNA1E	RFLNB	EFNB2	FEZF2	FEZF2	CAMK2G	LBX1	HES2	CPLX1	FOXA2	KCNC4	P2RY1	HES1	CHRNA5	AVP	DMRTA2	LHX1	AVP	HOXA2	SFRP2	DMRTA2	OXTR	NKX6-1	CRTAC1	DRD1	LHX4	GRIN2A	PRKCG	PRKCG	CNIH2	EMB	HOXD3
	CHRNB3	CHRNB3	CHRNB3	CHRNB3	FOXA1	CNP	FOXA1	DIO3	AVPR1A	DPYSL2	CNR1	CNR1	GATA3	CRHBP	ISL1	BRS3	KCNC4	CHRNA5	FEZF2	SEMA6D	HES1	HES1	DGKQ	OLIG2	HOXA2	CRHBP	FZD5	PRKCG	VIP	ISL1	CHRNB3	AVPR1A	DRD1	PKD1	AVPR1A	ID3	OLIG2	DPYSL2	P2RY1	NKX6-2	DMRTA2	GAD2	NKX6-1	MAG	HRH3	HRH3	CRHBP	SEMA6D	ISL1
	CNIH2	CNIH2	CNIH2	CNIH2	FOXA2	CNR1	FOXA2	DLL3	BDKRB2	DUOXA1	CPLX1	CPLX1	GSX2	DRD1	LBX1	DGKQ	KCNJ10	CHRNB3	HES1	RFLNB	HOXA2	HOXA2	CNR1	LHX4	HOXA3	DRD1	FZD6	HRH3		LHX5	CNR1	BDKRB2	EMX1	LBX1	BDKRB2	IRX3	MYT1L	DRD1	VIP	OLIG3	DPYSL2	KCNC4	NKX6-2	NPTX2	RIMS3	RIMS3	DRD1	FEZF1	WNT4
	CNP	CNP	CNP	CNP	FOXB1	CRHBP	FOXB1	DMRTA2	CAMK2G	EDNRB	DRD1	DRD1	HES1	FXYD6	DLX1	CNR1	CHAT	CNR1	HOXA2	FEZF2	ID3	ID3	COLQ	NKX6-1	HOXA5	FOXA2	GATA2	RIMS3		LHX1	CPLX1	BRS3	FEZF1	OLIG2	BRS3	ISL1	NKX6-1	SEMA6D		SOX1	DRD1	KCNJ10	OLIG3	OXT	P2RX1	P2RX1	FXYD6	FEZF2	ONECUT1
	CNR1	CNR1	CNR1	CNR1	FOXD1	DMRT3	FOXD1	DPYSL2	CASQ1	EFNB2	GRIN2B	GRIN2B	HOXA2	GRM5	TBR1	DRD1	PRKCG	CPLX1	ID3	FOXA1	IRX3	IRX3	CPLX1	NKX6-2	HOXA9	FOXD1	GATA3	SLC6A4		LHX6	CRHBP	CASQ1	FEZF2	NEFL	CASQ1	MAG	NKX6-2	EMX1		TLX3	SEMA6D	GRIN2A	SHH	CHRNB4	CHRNB4	CHRNB4	GAS6	FOXB1	PAX8
	COLQ	COLQ	COLQ	COLQ	FZD5	DRD1	FZD5	DUOXA1	CELF2	SEMA6D	GRM1	GRM1	ISL1	HOMER2	OLIG2	EDNRB	HRH3	CRHBP	IRX3	FOXA2	ISL1	ISL1	CRABP2	OLIG3	HOXB2	GALR1	HES1	P2RX1		LBX1	DRD1	CELF2	FOXB1	LHX4	CELF2	LBX1	OLIG3	FEZF1			EMX1	CHAT	SOX1	CARTPT	CPLX3	CPLX3	GRIN2B	FOXD1	NEUROD1
	CPLX1	CPLX1	CPLX1	CPLX1	GSX2	FEZF2	GSX2	EDNRB	CNIH2	FEZF1	GRM2	GRM2	LBX1	HOXA3	MYT1L	FRMPD1	SLC6A8	DRD1	ISL1	GATA2	LHX2	LHX2	CRHBP	SHH	HOXD3	GATA3	HOXA2	CHRNB4		SCN1B	FOXA2	CNR1	GATA2	ZIC1	CNR1	DLX1	PRDM14	FEZF2			FEZF1	PRKCG		NETO1	KCNMB4	KCNMB4	JPH1	GAB2	NEUROG3
	CRHBP	CRHBP	CRHBP	CRHBP	HES1	FOXA2	HES1	EFNB2	CRHBP	FEZF2	GRM5	GRM5	WNT4	JPH1	NKX6-1	FZD5	SV2C	EDNRB	LHX2	GATA3	MAG	MAG	CYP26A1	SOX1	HOXC4	GRP	HOXA3	CPLX3		SFRP2	FZD5	CTGF	GSX2	NEUROG3	CTGF	SLC6A4	SHH	FOXB1			FEZF2	HRH3		OPRD1	CAMK2A	CAMK2A	KCNA3	GATA3	NKX6-1
	DRD1	DRD1	DRD1	DRD1	HES2	FOXB1	HES2	SEMA6D	CTGF	FOXA1	KCNC4	KCNC4	SFRP2	KCNA3	NKX6-2	FZD6	RIMS3	FOXA2	MAG	GDF10	LBX1	LBX1	DGAT2	TAL1	HOXB5	ISL1	HOXA5	KCNMB4		DLX1	GAB2	DLL4	HES1	NKX6-1	DLL4	OLIG2	SOX1	FOXG1			FOXB1	RIMS3		PTK2B	SYT12	SYT12	KCNAB2	GFRA2	NKX6-2
	GAD2	GAD2	GAD2	GAD2	HHIP	GLRA1	HHIP	EMX1	DSP	GATA2	KCNJ10	KCNJ10	ONECUT1	KCNAB2	OLIG3	GALR1	SLC6A4	FZD5	LBX1	HES1	DLX1	DLX1	DHRS3		HOXC5	KCNC4	HOXA9	CAMK2A		TBR1	GALR1	DRD1	ISL1	NKX6-2	DRD1	DNM3	SOX2	FZD6			FOXG1	SLC6A4		SHANK2	MEF2C	MEF2C	KCNAB3	HOXA2	ONECUT2
	GJC1	GJC1	GJC1	GJC1	HOXA2	GRIN2B	HOXA2	FERD3L	EDNRB	GATA3	GRIN2A	GRIN2A	DLX1	KCNAB3	SHH	VIPR1	P2RX1	GAB2	DLX1	HOXA2	SLC6A4	NEUROD2	DIO3		HOXC6	KCNS3	HOXB2	SYT12		OLIG2	GAS6	DSP	LHX5	OLIG3	DSP	MEIS1	TLX3	GATA2			FZD6	P2RX1		SHISA9	P2RY1	P2RY1	KCNC4	ISL1	SHH
	GLRA1	GLRA1	GLRA1	GLRA1	HOXA3	GRM1	HOXA3	FEZF1	GALR1	GDF6	PRKCG	PRKCG	TBR1	KCNC4	SOX1	GLRA1	TRPC4	GALR1	NPPC	HOXA5	OLIG2	SLC6A4	DUOXA1		HOXD4	MAFA	HOXD3	MEF2C		LHX4	GATA2	EDNRB	LHX1	SHH	EDNRB	NR2E1		GRIN2B			GATA2	CHRNB4		SOX10	PRRT2	PRRT2	KCNC3	ISLR2	SIX3
	GLRA3	GLRA3	GLRA3	GLRA3	HOXA5	GRM5	HOXA5	FEZF2	GAS6	HES1	NPTX2	NPTX2	OLIG2	KCNC3	TLX3	GLRA3	CHRNB4	GAS6	SLC6A4	HOXA9	DNM3	OLIG2	FOXA1		LHX1	CHAT	HOXC4	P2RY1		NKX6-1	GATA3	GAS6	LHX2	SOX1	GAS6	PLK2		GSX2			GRIN2B	CPLX3		STX1B	APBA1	APBA1	KCNG1	LHX1	SOX2
	GRIN2B	GRIN2B	GRIN2B	GRIN2B	HOXA9	GRP	HOXA9	FOXA1	GJC1	HGF	NEUROD2	NEUROD2	CYP26B1	KCNG1		GPR17	CPLX3	GATA2	OLIG2	ID3	MEIS1	DNM3	FOXA2		SFRP2	PRKCG	HOXB5	RAB3B		NKX6-2	GRP	GJC1	LHX6	TAL1	GJC1	POU4F2		HES1			GSX2	KCNMB4		VIP	SLC18A3	SLC18A3	KCNIP4	LHX2	STRA6
	GRM1	GRM1	GRM1	GRM1	HOXB2	HOMER2	HOXB2	GATA2	GLRA1	HOXA2	OXT	OXT	SOX5	KCNIP4		GPR179	KCNMB4	GATA3	DNM3	IGFBP5	NKX6-1	MEIS1	FOXD1		ARC	HRH3	HOXD4	RGS2		NR2E1	ISL1	HOXB2	WNT4		HOXB2	PPP3CA		HOXA2			HES1	CAMK2A			SLC6A9	SLC6A9	KCNJ10	LHX9
	GRM2	GRM2	GRM2	GRM2	HOXD3	KCNJ10	HOXD3	GATA3	GRM1	HOXD3	RIMS3	RIMS3	MYT1L	KCNJ10		GPR22	SLC6A13	GRP	MEIS1	IRX3	NKX6-2	NKX6-1	GALR1		HOXA6	RIMS3	IRX3	APBA1		OLIG3	KCNC4	IRX5	DLX1		IRX5	SEMA3B		HOXB2			HOXA2	SLC6A5			SNAP25	SNAP25	KCNK12	SLIT3
	GRM5	GRM5	GRM5	GRM5	HOXC4	LEPR	HOXC4	GDF6	GSX2	ID3	SLC6A4	SLC6A4	MEF2C	KCNK12		GPR6	CAMK2A	ISL1	NKX6-1	ISL1	NR2E1	NKX6-2	GATA3		NEUROD1	P2RX1	IRX5	SNCG		SHH	KCNS3	NPY1R	TBR1		NPY1R	SEMA3D		INA			HOXB2	SYT12			SNCG	SNCG	KCNQ2	MAG
	HTR1E	HTR1E	HTR1E	HTR1E	HOXB5	GRIN2A	HOXB5	GSX2	HGF	IRX3	P2RX1	P2RX1	NEUROD1	KCNQ2		GPR26	SLC6A5	KCNC4	NKX6-2	LHX2	PLK2	NR2E1	GRP		OTX2	CCKAR	ITGA7	STX1B		SOX1	PRKCG	SCN4B	OLIG2		SCN4B	SHH		ISL1			INA	MEF2C			STX1B	STX1B	KCNQ4	GFRA1
	KCNC4	KCNC4	KCNC4	KCNC4	HOXC5	NPY1R	HOXC5	HES1	IGFBP5	ISL1	CHRNB4	CHRNB4	NKX6-1	KCNQ4		GRM1	SYT12	KCNS3	NR2E1	UBASH3B	POU4F2	PLK2	ISL1		ROR2	KCNA5	ITGB4			TAL1	HRH3	SCN1B	POU3F3		SCN1B	SIX3		LHX5			ISL1	P2RY1					KCNS3	SCN1B
	KCNJ10	KCNJ10	KCNJ10	KCNJ10	HOXC6	PRKCG	HOXC6	HES2	IRX5	ISLR2	CPLX3	CPLX3	NKX6-2	KCNS3		GRM2	MEF2C	PRKCG	PLK2	MAG	PPP3CA	POU4F2	KCNS3		SHH	CHRNB4	KCNQ4			TSKU	OXT	MC3R	CCKAR		MC3R	SOX2		LHX1			LHX5	PRIMA1					GRIN2A	TBR1
	KCNQ2	KCNQ2	KCNQ2	KCNQ2	HOXD4	MC3R	HOXD4	HGF	GRIN2A	MAG	KCNMB4	KCNMB4	NR2E1	UBASH3B		GRM5	P2RY1	HRH3	POU4F2	LBX1	PRTG	PPP3CA	MAFA		SIX3	CPLX3	LHX1			NFIB	RIMS3	NPPC	NEFL		NPPC	STX1B		LHX2			LHX1	PRRT2					PKD1	CHL1
	GRIN2A	GRIN2A	GRIN2A	GRIN2A	IRX3	NPTX2	IRX4	HOXA2	MAG	LBX1	CAMK2A	CAMK2A	OLIG3	SCN4B		GRP	PRRT2	OXT	PPP3CA	WNT4	SEMA3B	PRTG	CHAT		TBX18	CARTPT	LHX2				SLC6A4	OXT	SSTR4		OXT	THY1		LHX6			LHX2	PTK2B					UBASH3B	NEFH
	CHAT	CHAT	CHAT	CHAT	ISL1	TBR1	IRX3	HOXD3	SCN4B	SCN1B	NPAS4	NPAS4	ONECUT2	CACNG6		HOMER2	RAB3B	RIMS3	PRTG	LBH	SEMA3D	SEMA3B	WNT4			KCNMB4	SULF1				P2RX1	SLC6A4	CNTNAP2		SLC6A4	TLX3		GRIN2A			LHX6	RAB3B					SCN4B	EPHA3
	PRKCG	PRKCG	PRKCG	PRKCG	LHX1	NEUROD2	ISL1	ID3	SCN1B	SFRP2	SYT12	SYT12	PRDM14	SCN1B		HTR1E	RGS2	SLC6A4	RGS2	SFRP2	SHH	SEMA3D	CYP26B1			CAMK2A	CTHRC1				CCKAR	P2RX1	NEUROD1		P2RX1			WNT4			GRIN2A	RGS2					CACNG6	CCKAR
	SCN1B	SCN1B	SCN1B	SCN1B	LHX2	CHL1	LHX1	IRX3	MC3R	DLX1	NETO1	NETO1	ROR2	KCNK13		IQGAP2	APBA1	P2RX1	SEMA3B	DLX1	SIX3	SHH	CCKAR			PAX8	LBX1				KCNA5	KCNA5	NEUROG3		KCNA5			SFRP2			WNT4	SDS					SCN1B	NEFL
	NPTX2	NPTX2	NPTX2	NPTX2	SFRP2	OXT	LHX2	ISL1	NPTX2	TBR1	ARC	ARC	SHH	HRH3		GRK1	SLC18A3	CCKAR	SEMA3D	NPPC	SOX10	SIX3	CRABP1			SYT12	WNT4				CHRNB4	CARTPT	NKX2-6		CARTPT			DLX1			SFRP2	APBA1					KCNT1	LHX4
	NEUROD2	NEUROD2	NEUROD2	NEUROD2	DLX1	TMOD1	LBX1	ISLR2	NPPC	NEUROD2	MEF2C	MEF2C	SOX1	OXT		NPY1R	SLC6A7	KCNA5	SHH	SLC6A4	SOX2	SOX10	KCNA5			MEF2C	SFRP2				CPLX3	KCNMB4	NR2E1		KCNMB4			TBR1			DLX1	SLC18A3					KCNK13	NKX6-1
	HRH3	HRH3	HRH3	HRH3	TBR1	SLC6A4	SFRP2	LHX2	OXT	EPHA3	NPY5R	NPY5R	SOX2	SCN8A		MC3R	SLC6A9	CHRNB4	SIX3	OLIG2	STX1B	SOX2	CPLX3			NEUROD1	SP8				CARTPT	MYL1	OTX2		MYL1			NEUROD2			TBR1	SLC6A9					GPM6A	NR2E1
	OXT	OXT	OXT	OXT	SP8	CCKAR	DLX1	MAG	P2RX1	SLC6A4	NR2E1	NR2E1	TAL1	SLC6A4		PDE1A	SNAP25	CPLX3	SOX10	CARTPT	THY1	STX1B	CARTPT			NKX6-1	CYP26B1				KCNMB4	OXTR	OXTR		OXTR			SLC6A4			NEUROD2	SNAP25					SCN8A	OTX2
	SV2C	SV2C	SV2C	SV2C	CYP26B1	CHRNB4	TBR1	LBX1	TRPC3	OLIG2	OXTR	OXTR	TLX3	P2RX1		RGS11	SNCG	CARTPT	SOX2	DNM3	TLX3	THY1	PAX8			NMB	PAX8				CAMK2A	P2RY1	SHH		P2RY1			OLIG2			SLC6A4	SNCG					P2RX1	PALLD
	RIMS3	RIMS3	RIMS3	RIMS3	PAX8	CARTPT	SP8	SCN1B	KCNA5	NEFL	P2RY1	P2RY1		TRPC3		HRH3	STX1B	KCNMB4	STX1B	LDLRAD4		TLX3	RBP1			P2RY1	CLRN1				PAX8	P2RY2	SIX3		P2RY2			POU3F3			OLIG2	STX1B					TRPC4	POU4F2
	SLC6A4	SLC6A4	SLC6A4	SLC6A4	ARC	NPAS4	CYP26B1	SFRP2	CHRNB4	DNM3	PLCL1	PLCL1		KCNA5		NPY4R		CAMK2A	THY1	MAFB			NEUROD1			PPP3CA	ZIC1				SYT12	PPP1R13L	SOX1		PPP1R13L			CCKAR			POU3F3						TRPC3	SEMA3B
	GABRG3	GABRG3	GABRG3	GABRG3	HOXA6	KCNK4	PAX8	DLX1	CARTPT	LRRC7	PLK2	PLK2		CAMK2A		OXT		PAX8	TLX3	MEIS1			NKX6-1			PRRT2	SOX7				MBP	RENBP	SOX2		RENBP			NEFL			CCKAR						KCNA5	SEMA3D
	P2RX1	P2RX1	P2RX1	P2RX1	MAFB	GPR52	ZIC1	TBR1	KCNMB4	ARC	PPP3CA	PPP3CA		KCNK4		GABRG3		SYT12		NKX6-1			NMB			NR1D1	HOXA6				MEF2C	RGS2	TAL2		RGS2			ZIC1			NEFL						KCNMB4	SHH
	CHRNB4	CHRNB4	CHRNB4	CHRNB4	MEF2C	ZIC1	ARC	NEUROD2	NETO1	MEF2C	PRRT2	PRRT2		KCNJ4		CCKAR		SSTR4		NKX6-2			P2RY1			APBA1	MAB21L2				NEUROD1	SGCG	TSKU		SGCG			SSTR4			ZIC1						SLC6A5	SPRY3
	CPLX3	CPLX3	CPLX3	CPLX3	NEUROD1	NETO1	HOXA6	EPHA3	NEUROD1	MEIS1	PTK2B	PTK2B		SYT12		CARTPT		MBP		NR2E1			PPP3CA			SLC18A3	MAFB				NKX6-1	STC1	NFIB		STC1			CNTNAP2			SSTR4						KCNK4	THY1
	CARTPT	CARTPT	CARTPT	CARTPT	NKX6-1	ARC	MAFB	SLC6A4	NPNT	NDNF	RAB3B	RAB3B		SSTR4		CAMK2A		MEF2C		PLK2			NR1D1			SLC6A9	MBP				NMB	TACR3			TACR3			MAFB			CNTNAP2						PKD1L2	TIAM1
	KCNMB4	KCNMB4	KCNMB4	KCNMB4	NKX6-2	CNTNAP2	MEF2C	OLIG2	OPRD1	NEUROD1	ROR2	ROR2		NETO1		PAX8		NEUROD1		POU4F2			RDH10			SNAP25	MEF2C				NPY5R	UTS2			UTS2			MBP			MAFB						KCNJ4	SPON2
	CAMK2A	CAMK2A	CAMK2A	CAMK2A	OTX2	MEF2C	NEUROD1	CAMK2A	OXTR	NEUROG3	APBA1	APBA1		ARC		GPR52		NKX6-1		PPP3CA			RDH5			SNCG	NEUROD1				OXTR	UTS2B			UTS2B			NEUROD1			MBP						NETO1	TSKU
	EGR3	EGR3	EGR3	EGR3	ROR2	MEIS1	NKX6-1	NEFL	PPP3CA	NKX6-1	SHANK2	SHANK2		MEF2C		ECEL1		NMB		PRDM6			RPE65			STX1B	OTX2				P2RY1	VIP			VIP			NEUROG3			NEUROD1						ARC	TSPAN2
	SLC6A5	SLC6A5	SLC6A5	SLC6A5	SHH	MRAP2	NKX6-2	DNM3	PTK2B	NR2E1	SHISA9	SHISA9		NPY5R		SSTR4		NPY5R		PRTG			SCARB1			TIAM1	RDH10				PPP3CA							NKX2-6			NEUROG3						MEF2C	NFIB
	NPAS4	NPAS4	NPAS4	NPAS4	SIX3	NPY5R	OTX2	LRRC7	RGS2	PLK2	SNAP25	SNAP25		OPRD1		NPBWR1		OXTR		PTK2B			SHH			VIP	ROR2				RAB3B							NR2E1			NKX2-6						SLC30A4
	SYT12	SYT12	SYT12	SYT12	SOX1	NR2E1	ROR2	ARC	SHANK2	POU4F2	SNCG	SNCG		P2RY1		MC5R		P2RY1		RGS2			SNAP25				SHH				RAB3D							OTX2			NR2E1						PTK2B
	DLGAP1	DLGAP1	DLGAP1	DLGAP1	TBX18	OPRD1	SHH	MEF2C	SHISA9	PPP3CA	STX1B	STX1B		PTK2B		MCHR2		P2RY2		SEMA3B			TIAM1				SIX3				NR1D1							OXTR			OTX2						DYSF
	NPBWR1	NPBWR1	NPBWR1	NPBWR1		OXTR	SIX3	MEIS1	SOX10	PTK2B				RAB3B		MRAP2		PPP3CA		SEMA3D			VIP				SOX2				RASGRP1							PPP3CA			OXTR						REM2
	NETO1	NETO1	NETO1	NETO1		P2RY1	SOX1	NDNF	MTG1	RGS2				DYSF		NMB		RAB3B		SHH							SP9				APBA1							RGS2			PPP3CA						RGS2
	ARC	ARC	ARC	ARC		PLK2	STC1	NEUROD1	STC1	SEMA3B				REM2		NPY5R		RAB3D		SIX3							STRA6				SNAP25							TBC1D23			RGS2						SHANK2
	MBP	MBP	MBP	MBP		PRLH	TBX18	NEUROG3	STX1B	SEMA3D				RGS2		NXPH3		NR1D1		SOX10							TAL1				SNCG							SHANK2			TBC1D23						SHISA9
	MEF2C	MEF2C	MEF2C	MEF2C		RASD2		NKX6-1	TACR3	SERPINF1				SHANK2		OPRD1		RASGRP1		SOX2											STX1B							SHH			SHANK2						SLC18A3
	NPY5R	NPY5R	NPY5R	NPY5R		SERPINF1		NKX6-2	TLX3	SHANK2				SHISA9		OXTR		SCIN		STX1B											TIAM1							SIX3			SHH						SLC2A13
	NR2E1	NR2E1	NR2E1	NR2E1		APBA1		NR2E1	VIP	SHH				SNCG		P2RY1		APBA1		TAL1											VIP							SOX1			SIX3						SLC41A1
	OXTR	OXTR	OXTR	OXTR		SHANK2		PLK2		SIX3				STC1		P2RY2		SNAP25		THY1																		SOX2			SOX1						SLC4A11
	P2RY1	P2RY1	P2RY1	P2RY1		SIX3		POU4F2		SNAP25				TF		CXCL13		SNCG		TLX3																		TAL2			SOX2						SLC6A7
	PLCL1	PLCL1	PLCL1	PLCL1		SNAP25		PPP3CA		SOX2				THY1		PLCL1		STC1		UCMA																		TSKU			STRA6						SNAP25
	PLK2	PLK2	PLK2	PLK2		SNCG		PRTG		STX1B				VIP		PNOC		STX1B		VASN																		TSPAN2			TAL2						THY1
	PNOC	PNOC	PNOC	PNOC		STRA6		PTK2B		TCF4						PRLH		TIAM1																				NFIB			TSKU
	PPP3CA	PPP3CA	PPP3CA	PPP3CA		TACR3		RGS2		THY1						PTH2R		VIP																							TSPAN2
	PRR7	PRRT2	PRRT2	PRRT2		TAL1		SEMA3B		TIAM1						RGS16																									NFIB
	PRRT2	PTK2B	PTK2B	PTK2B		VIP		SEMA3D		TLX3						RGS2
	PTK2B	RAB3B	RAB3B	RAB3B		TPGS1		SERPINF1								TACR3
	RAB3B	RASD2	RASD2	RASD2				SHANK2								TIAM1
	RASD2	ROR2	ROR2	ROR2				SHH								UTS2
	ROR2	APBA1	APBA1	APBA1				SIX3								UTS2B
	APBA1	SHANK2	SHANK2	SHANK2				SNAP25								VIP
	SHANK2	SHISA9	SHISA9	SHISA9				SOX10
	SHISA9	SLC18A3	SLC18A3	SLC18A3				SOX2
	SLC18A3	SLC6A9	SLC6A9	SLC6A9				STX1B
	SLC6A9	SNAP25	SNAP25	SNAP25				TCF4
	SNAP25	SNCG	SNCG	SNCG				THY1
	SNCG	STX1B	STX1B	STX1B				TIAM1
	STX1B	UTS2	UTS2	UTS2				TLX3
	UTS2	TPGS1	TPGS1	TPGS1
	TPGS1
[truncated: 311 more columns]

## Sheet: 46_MBvHB_GO_BP
ID	GO:0003002	GO:0007389	GO:0001501	GO:0045165	GO:0048705	GO:0009952	GO:0060536	GO:0048706	GO:0007423	GO:0030049	GO:0033275	GO:0021953	GO:0006936	GO:0014706	GO:0048880	GO:0003416	GO:0003422	GO:0051216	GO:0021545	GO:0060537	GO:0098868	GO:0003417	GO:0021602	GO:0007517	GO:0061448	GO:0048598	GO:0003418	GO:0061061	GO:0021675	GO:0048663	GO:0001654	GO:0150063	GO:0007600	GO:0043010	GO:0048729	GO:0008015	GO:0048704	GO:0003013	GO:0003414	GO:0003429	GO:0090171	GO:0003012	GO:0030239	GO:0048589	GO:0003413	GO:0048665	GO:0007601	GO:0060351	GO:0071542
Description	regionalization	pattern specification process	skeletal system development	cell fate commitment	skeletal system morphogenesis	anterior/posterior pattern specification	cartilage morphogenesis	embryonic skeletal system development	sensory organ development	muscle filament sliding	actin-myosin filament sliding	central nervous system neuron differentiation	muscle contraction	striated muscle tissue development	sensory system development	endochondral bone growth	growth plate cartilage morphogenesis	cartilage development	cranial nerve development	muscle tissue development	bone growth	growth plate cartilage development	cranial nerve morphogenesis	muscle organ development	connective tissue development	embryonic morphogenesis	growth plate cartilage chondrocyte differentiation	muscle structure development	nerve development	neuron fate commitment	eye development	visual system development	sensory perception	camera-type eye development	tissue morphogenesis	blood circulation	embryonic skeletal system morphogenesis	circulatory system process	chondrocyte morphogenesis involved in endochondral bone morphogenesis	growth plate cartilage chondrocyte morphogenesis	chondrocyte morphogenesis	muscle system process	myofibril assembly	developmental growth	chondrocyte differentiation involved in endochondral bone morphogenesis	neuron fate specification	visual perception	cartilage development involved in endochondral bone morphogenesis	dopaminergic neuron differentiation
GeneRatio	31/279	34/279	36/279	22/279	22/279	19/279	8/279	15/279	31/279	7/279	7/279	17/279	22/279	24/279	24/279	8/279	6/279	17/279	9/279	24/279	8/279	7/279	7/279	24/279	19/279	30/279	6/279	31/279	10/279	10/279	22/279	22/279	26/279	20/279	30/279	25/279	11/279	25/279	5/279	5/279	5/279	22/279	8/279	30/279	6/279	7/279	15/279	7/279	7/279
BgRatio	199/8514	266/8514	316/8514	155/8514	155/8514	118/8514	19/8514	85/8514	330/8514	14/8514	14/8514	116/8514	190/8514	224/8514	225/8514	23/8514	8514-11-01	124/8514	32/8514	237/8514	25/8514	18/8514	18/8514	239/8514	160/8514	354/8514	13/8514	381/8514	48/8514	48/8514	221/8514	221/8514	292/8514	189/8514	373/8514	280/8514	64/8514	287/8514	8514-10-01	8514-10-01	8514-10-01	237/8514	34/8514	390/8514	17/8514	25/8514	125/8514	26/8514	26/8514
pvalue	2.62448e-13	5.82118e-12	3.9638e-11	5.46665e-09	5.46665e-09	7.50719e-09	6.64617e-08	8.47352e-08	1.00662e-07	1.0612e-07	1.0612e-07	1.96023e-07	2.31125e-07	2.79025e-07	3.03243e-07	3.84496e-07	4.7231e-07	5.22656e-07	5.53949e-07	7.91088e-07	8.0099e-07	8.78748e-07	8.78748e-07	9.21846e-07	1.07234e-06	1.49999e-06	1.65938e-06	2.35797e-06	2.64014e-06	2.64014e-06	3.08477e-06	3.08477e-06	3.16224e-06	3.45196e-06	4.39096e-06	4.69949e-06	6.09349e-06	7.28183e-06	8.02842e-06	8.02842e-06	8.02842e-06	9.64007e-06	1.03985e-05	1.06784e-05	1.07095e-05	1.08936e-05	1.31362e-05	1.44928e-05	1.44928e-05
p.adjust	8.23037e-10	9.12762e-09	4.14349e-08	3.42868e-06	3.42868e-06	3.92376e-06	2.97748e-05	3.02538e-05	3.02538e-05	3.02538e-05	3.02538e-05	5.12274e-05	5.57546e-05	6.25016e-05	6.3398e-05	7.53611e-05	8.71273e-05	9.10582e-05	9.14307e-05	0.000119615	0.000119615	0.000119815	0.000119815	0.000120454	0.000134515	0.000180922	0.000192734	0.000264092	0.000275983	0.000275983	0.000300509	0.000300509	0.000300509	0.000318392	0.00039343	0.000409378	0.000516464	0.000600942	0.000614076	0.000614076	0.000614076	0.000719792	0.000742661	0.000742661	0.000742661	0.000742661	0.000876493	0.000927541	0.000927541
qvalue	7.26014e-10	8.05162e-09	3.65504e-08	3.02449e-06	3.02449e-06	3.46121e-06	2.62649e-05	2.66874e-05	2.66874e-05	2.66874e-05	2.66874e-05	4.51885e-05	4.9182e-05	5.51337e-05	5.59244e-05	6.64772e-05	7.68563e-05	8.03239e-05	8.06525e-05	0.000105514	0.000105514	0.000105691	0.000105691	0.000106255	0.000118657	0.000159594	0.000170013	0.00023296	0.000243449	0.000243449	0.000265083	0.000265083	0.000265083	0.000280859	0.000347051	0.000361119	0.000455581	0.000530101	0.000541686	0.000541686	0.000541686	0.00063494	0.000655113	0.000655113	0.000655113	0.000655113	0.000773168	0.000818198	0.000818198
Genes	CYP26B1	CYP26B1	CHADL	BARHL2	COCH	DLL3	COCH	HOXA2	COL8A2	ACTC1	ACTC1	DLL4	ACTC1	ACTC1	COL8A2	COCH	COCH	CHADL	EGR2	ACTC1	COCH	COCH	EGR2	ACTC1	CHADL	CRABP2	COCH	ACTC1	EGR2	DLL4	COL8A2	COL8A2	COCH	COL8A2	ACTC1	ACTC1	HOXA2	ACTC1	COCH	COCH	COCH	ACTC1	ACTC1	BARHL2	COCH	DMRT3	DLL4	COCH	DMRTA2
	DLL4	DLL4	COCH	CYP26B1	COL14A1	FEZF1	COL14A1	HOXA3	CRB1	NEB	NEB	DMRT3	ATP2A1	CASQ1	CRB1	COL14A1	COL14A1	COCH	ERBB3	CASQ1	COL14A1	COL14A1	HOXA3	CASQ1	COCH	CYP26B1	COL14A1	CASQ1	ERBB3	DMRT3	CRB1	CRB1	DLL4	DLL4	ADAMTS16	ADAMTS16	HOXA3	ADAMTS16	COL14A1	COL14A1	COL14A1	ATP2A1	CASQ1	COCH	COL14A1	DMRTA2	EYA4	COL14A1	PHOX2A
	DLL3	DLL3	COL14A1	DLL4	CYP26B1	FZD5	HOXA5	HOXA5	CYP26B1	TMOD1	TMOD1	GABRB1	CASQ1	CYP26B1	DLL4	MATN3	MATN3	COL14A1	HOXA3	CYP26B1	MATN3	MATN3	HOXB2	CYP26B1	COL14A1	DLL4	MATN3	CYP26B1	GABRB3	DMRTA2	DLL4	DLL4	EYA4	FZD4	COCH	CORIN	HOXA5	CORIN	MATN3	MATN3	MATN3	CASQ1	NEB	COL14A1	MATN3	HOXD10	GLRA1	MATN3	SFRP1
	DMRT3	DMRT3	CYP26B1	DMRT3	HOXA2	HOXA2	MATN3	HOXB2	DLL4	ACTN3	ACTN3	HOXD10	GLRA1	DCN	FZD4	COL12A1	COL12A1	HOXA3	HOXB2	DCN	COL12A1	COL12A1	HOXB3	DCN	FOXD1	FZD5	COL12A1	DCN	HOXA3	HOXD10	FZD4	FZD4	FZD4	FZD5	COL14A1	ATP2A1	HOXB2	ATP2A1	COL12A1	COL12A1	COL12A1	GLRA1	TMOD1	CRABP2	COL12A1	LBX1	KCNJ10	COL12A1	FZD1
	DMRTA2	DMRTA2	DLL3	DMRTA2	HOXA3	HOXA3	COL12A1	HOXB3	FZD4	MYBPC1	MYBPC1	LBX1	CTTN	DLL4	FZD5	MATN2	MATN2	HOXA5	HOXB3	DLL4	MATN2	MATN2	HOXD3	DLL4	HOXA3	HOXA2	MATN2	DLL4	HOXB2	LBX1	FZD5	FZD5	GABRB3	DLX1	DLL4	AVP	HOXB3	AVP	MATN2	MATN2	MATN2	CTTN	LMOD2	CTTN	MATN2	ATOH1	VSX2	MATN2	OTX2
	EGR2	EGR2	GDF10	HOXA2	HOXA5	HOXA5	MATN2	HOXD3	FZD5	MYH4	MYH4	DLX1	OXT	DMRTA2	DLX1	NPPC	STC1	HOXB3	HOXD3	DMRTA2	NPPC	NPPC	PHOX2A	DMRTA2	HOXA5	HOXA3	NPPC	DMRTA2	HOXB3	DLX1	DLX1	DLX1	GLRA1	BCAR3	FOXD1	CASQ1	HOXD3	CASQ1				OXT	MYBPC1	HOXA5	NPPC	OLIG3	GUCY2F	NPPC	PHOX2B
	FEZF1	FEZF1	HOXA2	HOXD10	HOXB2	HOXB2	RSPO2	HOXC4	GABRB3	MYL1	MYL1	TBR1	SCN4B	EGR2	BCAR3	STC1		HOXD3	PHOX2A	EGR2	STC1	STC1	SEMA3A	EGR2	HOXB3	HOXA5		EGR2	HOXD3	TBR1	BCAR3	BCAR3	HOXD1	TMOD1	FZD4	DLL4	HOXC4	DLL4				SCN4B	MYOM1	MAG		TLX3	LAMB2	STC1	RSPO2
	FOXD1	FOXD1	HOXA3	LBX1	HOXB3	HOXB3	STC1	HOXB5	HOXA2			PHOX2A	RYR1	ERBB3	TMOD1	DDR2		HOXC4	PHOX2B	ERBB3	DDR2			ERBB3	HOXD3	HOXB2		ERBB3	PHOX2A	ATOH1	TMOD1	TMOD1	KCNJ10	LAMB2	FZD5	HOXB2	HOXB5	HOXB2				RYR1	PROX1	TNC			VSX1
	FZD5	FZD5	HOXA5	TCF7L2	HOXD3	HOXD3		HOXC5	DLX1			SFRP1	NEB	HOXD10	LAMB2			MATN3	SEMA3A	HOXD10				HOXD10	HOXC4	HOXB3		FLNC	PHOX2B	OLIG3	LAMB2	LAMB2	OPRK1	VSX1	HOXA5	OXT	HOXD10	OXT				NEB		SLC6A4			MFRP
	HOXA2	HOXA2	HOXB2	DLX1	HOXC4	HOXC4		HOXC6	BCAR3			FZD1	TMOD1	RYR1	VSX1			GDF6		RYR1				LBX1	MATN3	HOXD3		HOXD10	SEMA3A	TLX3	VSX1	VSX1	OXT	MAB21L2	HOXB2	SCN4B	HOXD4	SCN4B				TMOD1		SFRP1			NR2E1
	HOXA3	HOXA3	HOXB3	EYA2	HOXB5	HOXB5		HOXD1	ATOH1			NR2E1	P2RX1	EYA2	MAB21L2			COL12A1		EYA2				RYR1	GDF6	HOXC4		LBX1			MAB21L2	MAB21L2	VSX2	MEIS1	LBX1	HRH2	HOXA6	HRH2				P2RX1		SYT1			RGR
	HOXA5	HOXA5	HOXD3	TBR1	HOXD10	HOXC5		HOXD10	TMOD1			OLIG3	LMOD2	NEB	MEIS1			MATN2		NEB				NEB	COL12A1	HOXB5		TCF7L2			MEIS1	MEIS1	ITPR3	MFRP	TNC	RYR1		RYR1				LMOD2		RUFY3			RLBP1
	HOXB2	HOXB2	HOXC4	ATOH1	HOXD4	HOXC6		HOXD4	PAX8			PHOX2B	ACTN3	JPH2	MFRP			NPPC		JPH2				JPH2	MATN2	HOXD10		RYR1			MFRP	MFRP	GUCY2F	MYOM1	EYA2	P2RX1		P2RX1				ACTN3		ACTN3			RPE65
	HOXB3	HOXB3	HOXB5	SFRP1	SFRP1	HOXD10		DLX1	LAMB2			PROX1	MYBPC1	ACTN3	MYOM1			RSPO2		ACTN3				ACTN3	NPPC	HOXD4		NEB			MYOM1	MYOM1	LAMB2	NR2E1	SFRP1	SLC6A4		SLC6A4				MYBPC1		LAMB2			SIX3
	HOXD3	HOXD3	HOXC5	IL23R	MATN3	HOXD4		HOXA6	VSX1			RORA	MYH4	MEIS1	NR2E1			SCIN		MEIS1				FZD1	POU4F2	LBX1		JPH2			NR2E1	NR2E1	VSX1	PITX2	PAX8	ITPR3		ITPR3				MYH4		MATN3			SIX6
	HOXC4	HOXC4	HOXC6	NR2E1	COL12A1	SFRP1			MAB21L2			SEMA3A	MYL1	MYBPC1	PHOX2B			STC1		MYBPC1				MEIS1	RSPO2	EYA2		TMOD1			PITX2	PITX2	MBP	POU4F2	MATN3	MYL1		MYL1				MYL1		COL12A1
	HOXB5	HOXB5	HOXD1	OLIG3	HOXA6	HOXA6			MEIS1			TBX20	MYLPF	MYLPF	PITX2			WNT10B		MYLPF				MYBPC1	SCIN	ATOH1		LMOD2			POU4F2	POU4F2	MFRP	PROX1	COL12A1	NPPC		NPPC				MYLPF		MATN2
	HOXC5	HOXC5	HOXD10	PRDM14	MATN2	OTX2			MFRP				MYOM1	MYOM1	POU4F2					MYOM1				MYLPF	STC1	SFRP1		ACTN3			PROX1	PROX1	NR2E1	RPE65	FZD1	SEMA3A		SEMA3A				MYOM1		MEIS1
	HOXC6	HOXC6	HOXD4	PROX1	NPPC	SIX3			MYOM1				STC1	NKX2-6	PROX1					NKX2-6				MYOM1	WNT10B	PAX8		FZD1			RPE65	RPE65	POU4F2	SIX3	MATN2	SLC4A5		SLC4A5				STC1		NPPC
	HOXD10	HOXD10	RYR1	RORA	SP5				NKX2-6				TBX20	PHOX2B	RPE65					PHOX2B				PHOX2B		COL12A1		MEIS1			SIX3	SIX3	RGR	SLC4A5	MYBPC1	STAT1		STAT1				TBX20		POU4F2
	HOXD4	HOXD4	DLX1	TLX3	STC1				NR2E1				UTS2	POPDC3	SEMA3A					POPDC3				POPDC3		FZD1		MYBPC1			SIX6	SIX6	RLBP1		MYOM1	STC1		STC1				UTS2		PRLH
	DLX1	IRX4	SFRP1	WNT10B	WNT10B				PHOX2B				ZC3H12A	PROX1	SIX3					PROX1				PROX1		HOXA6		MYLPF			SLC4A5	SLC4A5	RPE65		PROX1	TBX20		TBX20				ZC3H12A		PROX1
	TBR1	LBX1	MATN3						PITX2					TBX20	SIX6					TBX20				TBX20		MAB21L2		MYOM1					SIX3		RSPO2	UTS2		UTS2						RSPO2
	SFRP1	DLX1	GDF6						POU4F2					WNT10B	SLC4A5					WNT10B				WNT10B		MBP		NKX2-6					SIX6		SEMA3A	UTS2B		UTS2B						SEMA3A
	PAX8	TBR1	COL12A1						PRDM16																	OTX2		PHOX2B					TRPA1		SIX3	ZC3H12A		ZC3H12A						SOX10
	HOXA6	SFRP1	HOXA6						PROX1																	PROX1		POPDC3					WNT10B		SOX10									STC1
	OTX2	PAX8	MATN2						RPE65																	RSPO2		PRDM6							STAT1									TAL2
	PITX2	HOXA6	MEIS1						SIX3																	SIX3		PROX1							STC1									TBX20
	SEMA3A	OTX2	NPPC						SIX6																	SP9		RORA							TBX20									WNT10B
	SIX3	PITX2	PAPSS2						SLC4A5																	TBX20		TBX20							HGF									DDR2
	TBX20	SEMA3A	PITX2						WNT10B																			WNT10B
		SIX3	RSPO2
		STC1	SCIN
		TBX20	SP5
			STC1
			WNT10B
[truncated: 41 more columns]

## Sheet: 46_MBvSC_GO_BP
ID	GO:0003002	GO:0001501	GO:0043062	GO:0030198	GO:0007423	GO:0006936	GO:0007389	GO:0009952	GO:0003012	GO:0048665	GO:0044057	GO:0061448	GO:0090596	GO:0045165	GO:0051216	GO:0019226	GO:0048880	GO:0048598	GO:0048705	GO:0035637	GO:0051046	GO:0001654	GO:0150063	GO:0008015	GO:0048706	GO:0048663	GO:0007600	GO:0099536	GO:0007186	GO:0003013	GO:0007268	GO:0098916	GO:0001708	GO:0099537	GO:0043588	GO:0030199	GO:0060537	GO:0048562	GO:1903530	GO:0014706	GO:0010817	GO:0030855	GO:0050953	GO:0009954	GO:0002062	GO:0043269	GO:0007601	GO:0043010	GO:0023061
Description	regionalization	skeletal system development	extracellular structure organization	extracellular matrix organization	sensory organ development	muscle contraction	pattern specification process	anterior/posterior pattern specification	muscle system process	neuron fate specification	regulation of system process	connective tissue development	sensory organ morphogenesis	cell fate commitment	cartilage development	transmission of nerve impulse	sensory system development	embryonic morphogenesis	skeletal system morphogenesis	multicellular organismal signaling	regulation of secretion	eye development	visual system development	blood circulation	embryonic skeletal system development	neuron fate commitment	sensory perception	synaptic signaling	G protein-coupled receptor signaling pathway	circulatory system process	chemical synaptic transmission	anterograde trans-synaptic signaling	cell fate specification	trans-synaptic signaling	skin development	collagen fibril organization	muscle tissue development	embryonic organ morphogenesis	regulation of secretion by cell	striated muscle tissue development	regulation of hormone levels	epithelial cell differentiation	sensory perception of light stimulus	proximal/distal pattern formation	chondrocyte differentiation	regulation of ion transport	visual perception	camera-type eye development	signal release
GeneRatio	52/780	67/780	53/780	47/780	67/780	45/780	56/780	33/780	51/780	14/780	61/780	39/780	39/780	38/780	33/780	18/780	48/780	65/780	37/780	29/780	72/780	46/780	46/780	54/780	25/780	18/780	55/780	72/780	77/780	54/780	71/780	71/780	19/780	71/780	33/780	14/780	45/780	38/780	64/780	43/780	54/780	57/780	29/780	11/780	21/780	61/780	28/780	37/780	50/780
BgRatio	199/8514	316/8514	223/8514	190/8514	330/8514	190/8514	266/8514	118/8514	237/8514	25/8514	311/8514	160/8514	160/8514	155/8514	124/8514	43/8514	225/8514	354/8514	155/8514	105/8514	418/8514	221/8514	221/8514	280/8514	85/8514	48/8514	292/8514	425/8514	468/8514	287/8514	420/8514	420/8514	56/8514	423/8514	142/8514	33/8514	237/8514	187/8514	388/8514	224/8514	310/8514	334/8514	127/8514	24/8514	78/8514	373/8514	125/8514	189/8514	290/8514
pvalue	1.32982e-12	2.71986e-11	4.23185e-11	1.29521e-10	2.02067e-10	1.46722e-09	1.6592e-09	2.84471e-09	4.15475e-09	4.47901e-09	5.57277e-09	7.86144e-09	7.86144e-09	1.03386e-08	1.11431e-08	1.14639e-08	1.61406e-08	2.63512e-08	3.46323e-08	3.54507e-08	7.00976e-08	7.11116e-08	7.11116e-08	7.8514e-08	8.09821e-08	8.85602e-08	1.35773e-07	1.39148e-07	1.74525e-07	1.83751e-07	1.86426e-07	1.86426e-07	2.47049e-07	2.47922e-07	3.73496e-07	4.08853e-07	1.52593e-06	1.84165e-06	1.85986e-06	1.93322e-06	2.29745e-06	2.3429e-06	2.77386e-06	2.91062e-06	4.28484e-06	4.35617e-06	6.10351e-06	6.28786e-06	7.38138e-06
p.adjust	5.48686e-09	5.61106e-08	5.8202e-08	1.33601e-07	1.66746e-07	9.7798e-07	9.7798e-07	1.46716e-06	1.84804e-06	1.84804e-06	2.0903e-06	2.4951e-06	2.4951e-06	2.95626e-06	2.95626e-06	2.95626e-06	3.91743e-06	6.04028e-06	7.31348e-06	7.31348e-06	1.27568e-05	1.27568e-05	1.27568e-05	1.33653e-05	1.33653e-05	1.40538e-05	2.05045e-05	2.05045e-05	2.40373e-05	2.40373e-05	2.40373e-05	2.40373e-05	3.00861e-05	3.00861e-05	4.40299e-05	4.68591e-05	0.000170162	0.000196764	0.000196764	0.000199412	0.000230162	0.000230162	0.000266162	0.000272936	0.00039073	0.00039073	0.000535811	0.000540494	0.000621542
qvalue	4.83356e-09	4.94298e-08	5.12722e-08	1.17694e-07	1.46892e-07	8.61537e-07	8.61537e-07	1.29247e-06	1.628e-06	1.628e-06	1.84141e-06	2.19802e-06	2.19802e-06	2.60427e-06	2.60427e-06	2.60427e-06	3.451e-06	5.3211e-06	6.4427e-06	6.4427e-06	1.12379e-05	1.12379e-05	1.12379e-05	1.17739e-05	1.17739e-05	1.23805e-05	1.80631e-05	1.80631e-05	2.11753e-05	2.11753e-05	2.11753e-05	2.11753e-05	2.65039e-05	2.65039e-05	3.87874e-05	4.12798e-05	0.000149901	0.000173336	0.000173336	0.000175669	0.000202758	0.000202758	0.000234471	0.000240439	0.000344207	0.000344207	0.000472014	0.00047614	0.000547538
Genes	ALDH1A2	CHADL	APOB	CDH1	ACHE	ACTC1	ALDH1A2	ALDH1A2	ACTC1	ASCL1	ACTN3	ACTA2	ALDH1A3	ASCL1	CHADL	AVP	ACHE	ALDH1A2	CHST11	CORIN	ACHE	ACHE	ACHE	ACTC1	CHST11	ASCL1	ADRA2C	ACHE	ADRA2C	ACTC1	ACHE	ACHE	ASCL1	ACHE	CLDN4	CHADL	ACTC1	ALDH1A3	ACHE	ACTC1	ACHE	ACTA2	CLDN19	ALDH1A2	CHADL	APOE	CLDN19	ACHE	ADRA2C
	ASCL1	CHST11	APOE	CHADL	ALDH1A2	ACTA2	ASCL1	DLL3	ACTA2	DMRT3	CORIN	CHADL	COL11A1	BARHL2	CHST11	AVPR1A	ALDH1A2	ALDH1A3	COL11A1	ATP1A2	CORIN	ALDH1A2	ALDH1A2	ACTA2	COL11A1	DLL4	BARHL1	APOE	APLN	ACTA2	APOE	APOE	DMRT3	APOE	CNFN	COL11A1	ACTN3	CHST11	ADRA2C	ACTN3	CORIN	AGR2	COL11A1	CYP26B1	CHST11	ATP1A2	COL11A1	ALDH1A2	APLN
	CYP26B1	COL11A1	CDH1	COL11A1	ALDH1A3	ACTN3	CYP26B1	FEZF1	ACTN3	DMRTA2	ADRA2C	CHST11	COL2A1	CYP26B1	COL11A1	CLDN19	ALDH1A3	APLN	COL14A1	ATP2A1	ADRA2C	ALDH1A3	ALDH1A3	ADAMTS16	COL2A1	DMRT3	CLDN19	ATP1A2	APOE	ADAMTS16	ATP1A2	ATP1A2	DMRTA2	ATP1A2	COL3A1	COL14A1	ALDH1A2	COL11A1	APLN	ALDH1A2	ADRA2C	ARHGEF26	COL2A1	FGF10	COL11A1	AVP	COL2A1	ALDH1A3	BAIAP3
	DLL4	COL14A1	CHADL	COL14A1	ASCL1	ADRA2C	DLL4	FZD5	ADRA2C	ESRP1	APLN	COL11A1	COL5A1	DLL4	COL14A1	DMRT3	COL5A1	CHST11	COL2A1	AVP	APLN	COL5A1	COL5A1	CORIN	FGF9	DMRTA2	COL11A1	BAIAP3	S1PR4	CORIN	BAIAP3	BAIAP3	ESRP1	BAIAP3	COL5A1	COL2A1	ATF3	COL2A1	AVP	ATF3	ALDH1A2	ASCL1	DLL4	HOXA11	COL14A1	AVPR1A	DLL4	COL8A2	C1QTNF1
	DLL3	COL2A1	COL11A1	COL17A1	BMPER	ATP1A2	DLL3	HOXA11	ATP1A2	HOXC10	AQP1	COL14A1	COL8A2	DMRT3	COL2A1	GLRA1	COL8A2	COL11A1	COMP	AVPR1A	AQP1	COL8A2	COL8A2	ADRA2C	HOXA11	ESRP1	COL2A1	CDH1	ARHGEF26	ADRA2C	CDH1	CDH1	HOXA11	CDH1	CYP26B1	COL3A1	CASQ1	EFEMP1	AVPR1A	CASQ1	ALDH1A3	CLDN3	EFEMP1	HOXA9	COL2A1	CASQ1	EFEMP1	DLL4	CCKAR
	DMRT3	COL3A1	COL14A1	COL2A1	COL11A1	ATP2A1	DMRT3	HOXA2	ATP2A1	HOXD10	ATP1A2	COL2A1	CYP26B1	DMRTA2	COMP	ITGA2	DLL4	COL2A1	CSGALNACT1	CASQ1	AVP	DLL4	DLL4	APLN	HOXA2	HOXC10	DLL4	CHRNA2	AVP	APLN	CHRNA2	CHRNA2	HOXC10	CHRNA2	DSP	COL5A1	COL11A1	FGF10	BAIAP3	COL11A1	APLN	CNFN	GJC1	HOXC10	CTGF	CNIH2	GJC1	EFEMP1	CHRNA5
	DMRTA2	COL9A2	COL17A1	COL3A1	COL2A1	BDKRB2	DMRTA2	HOXA3	BDKRB2	ISL1	ATP2A1	COL5A1	EFEMP1	ESRP1	CSGALNACT1	KCNMB3	EFEMP1	COL5A1	CTGF	CLDN19	AVPR1A	EFEMP1	EFEMP1	APOE	HOXA3	HOXD10	EFEMP1	CHRNA5	AVPR1A	APOE	CHRNA5	CHRNA5	HOXD10	CHRNA5	FGF10	SFRP2	COL3A1	FGF9	C1QTNF1	CYP26B1	ASMT	CYP26B1	GLRA1	HOXC11	EFEMP1	CNIH3	GLRA1	FGF10	CPLX1
	EMX1	COMP	COL2A1	COL5A1	COL5A1	CASQ1	EMX1	HOXA5	CASQ1	LBX1	AVP	COMP	FGF10	FGF10	CTGF	TYMP	FGF10	CRABP2	CYP26B1	DMRT3	BAIAP3	FGF10	FGF10	ATP1A2	HOXA5	ISL1	GABRB3	CNIH2	BAIAP3	ATP1A2	CNIH2	CNIH2	ISL1	CNIH2	FST	COL5A2	CYP26B1	FZD5	C1QTNF4	DCN	BACE2	DSP	KCNJ10	HOXD10	RFLNB	CRHBP	KCNJ10	FZD5	CRHBP
	FEZF1	CSGALNACT1	COL3A1	COL8A2	COL8A2	COMP	FEZF1	HOXA9	COMP	ATOH1	AVPR1A	CSGALNACT1	FGF9	GCM1	EFEMP1	MAG	FGF9	CYP26B1	RFLNB	DSP	C1QTNF1	FGF9	FGF9	ATP2A1	HOXA9	LBX1	GJC1	CNIH3	BDKRB2	ATP2A1	CNIH3	CNIH3	LBX1	CNIH3	FZD6	COL12A1	DCN	FZD6	CCKAR	DLL4	BAIAP3	EMX1	KERA	DLX1	FGF9	DYSF	KERA	GRHL3	EXOC3L1
	FGF1	CTGF	COL5A1	COL9A2	CYP26B1	CTGF	FGF1	HOXB2	CTGF	ISL2	BDKRB2	CTGF	FZD5	HOXA11	RFLNB	SCN1B	FZD5	DLL4	HOXA11	GJC1	C1QTNF4	FZD5	FZD5	AVP	HOXB2	DLX1	GLRA1	CNP	CCKAR	AVP	CNP	CNP	SFRP2	CNP	GRHL3	ADAMTS3	DLL4	GRHL3	CHRNA5	DMRTA2	C1QTNF1	ESRP1	VSX2	SP8	GDF6	FXYD6	VSX2	KERA	C1QTNF12
	FGF10	CYP26B1	COL8A2	COLQ	DLL4	DSP	FGF10	HOXB3	DSP	MNX1	C1QTNF1	DGAT2	FZD6	HOXA2	FGF9	CHRM5	GRHL3	EFEMP1	HOXA2	GLRA1	CCKAR	GRHL3	GRHL3	AVPR1A	HOXB3	TBR1	HOXD1	COLQ	CYSLTR1	AVPR1A	COLQ	COLQ	ATOH1	COLQ	HOXC13	LOX	DMRTA2	HOXA11	CPLX1	DSP	CCKAR	FGF10	USH1G	SIX3	HOXA11	HOXA3	IMPG1	LHX2	FOXD1
	FOXD1	DLL3	COL9A2	COMP	EFEMP1	DYSF	FOXD1	HOXD3	DYSF	OLIG3	CASQ1	EFEMP1	GRHL3	HOXC10	GDF6	S1PR1	ISL1	FGF10	HOXA3	ITGA2	CHRNA5	KERA	KERA	BDKRB2	HOXD3	ATOH1	HTR2A	CPLX1	FZD5	BDKRB2	CPLX1	CPLX1	ISL2	CPLX1	HOXA7	LUM	DSP	HOXA2	CRHBP	ERBB3	COLQ	HOXA5	IMPG1		SFRP2	HTR2A	GUCY2F	DLX1	GALR1
	FZD5	EFEMP1	COLQ	CSGALNACT1	ESRP1	GJC1	FZD5	HOXC4	GJC1	SOX1	CELF2	RFLNB	HOXA2	HOXD10	HOXA11	CNTNAP1	KERA	FGF9	HOXA5	KCNMB3	CPLX1	LHX2	LHX2	CASQ1	HOXC4	GSX1	ITGA2	CRHBP	FZD6	CASQ1	CRHBP	CRHBP	MNX1	CRHBP	HPSE	MMP11	ERBB3	HOXA3	DDX58	FGF9	CPLX1	HOXB5	GUCY2F		MATN3	KCNA3	LAMB2	BCAR3	PDX1
	HOXA11	RFLNB	COMP	CTGF	FGF10	GLRA1	GRHL3	HOXB5	GLRA1	TLX3	CNIH2	FGF9	HOXC13	ISL1	HOXA3	SCN8A	LHX2	FZD5	HOXB2	TYMP	CRHBP	CHRDL1	CHRDL1	CELF2	HOXB5	ISL2	KCNJ10	GABRB3	GABRB3	CELF2	GABRB3	GABRB3	MYL2	GABRB3	IGFBP5	DDR2	FGF9	HOXA5	C1QTNF12	GJC1	CRABP2	PDX1	LAMB2		COL12A1	KCNAB2	CLRN1	TMOD1	HTR2A
	HOXA2	FGF9	CSGALNACT1	DCN	FGF9	CTTN	HOXA11	HOXC6	CTTN		CRHBP	FOXD1	KCNQ4	LBX1	HOXA5	P2RX1	CHRDL1	FZD6	HOXB3	MAG	DDX58	DLX1	DLX1	COMP	HOXC6	MNX1	KCNQ4	GAD2	GALR1	COMP	GAD2	GAD2	OLIG3	GAD2	ITGA2		GJC1	HOXB2	FZD5	HOXD10	CRHBP	HOXA7	CLRN1		COL21A1	KCNC3	VSX1	LAMB2	ISL1
	HOXA3	GDF10	CTGF	EGFL6	FZD5	HTR2A	HOXA2	HOXC5	HTR2A		CTGF	GDF6	CTHRC1	MTOR	HOXB3	CHRNB4	DLX1	GCM1	HOXD3	SCN4B	ERBB3	BCAR3	BCAR3	CTGF	HOXC5	OLIG3	KERA	GJC1	GLRA1	CTGF	GJC1	GJC1	PRDM14	GJC1	ITGB4		HOXD10	HOXB3	GAB2	ISL1	CYP26A1	ITGA2	VSX1		ADAMTS12	KCNG4	COL18A1	TSPAN12	KCNS3
	HOXA5	GDF6	DCN	GAS6	FZD6	ITGA2	HOXA3	HOXC10	IGFBP5		DSP	HOXA11	USH1G	TCF7L2	HOXD3	CARTPT	BCAR3	GRHL3	HOXC4	SCN1B	C1QTNF12	COL5A2	COL5A2	DLL4	HOXC11	SOX1	OXT	GLRA1	GLRA3	DLL4	GLRA1	GLRA1	SOX1	GLRA1	KRT15		IGFBP5	HOXD3	GALR1	MTOR	CYP26B1	KRT15	COL18A1		SCIN	KCNJ10	LUM	MYOM2	KISS1
	HOXA9	HOXA11	EGFL6	HAPLN1	GABRB3	OXT	HOXA5	HOXC11	ITGA2		FGF10	HOXA3	BCAR3	WNT4	HOXC4	KCNMB4	COL5A2	HOXA11	HOXB5	CHRM5	FGF10	TMOD1	TMOD1	DSP	HOXC9	TLX3	MTOR	GLRA3	GPR151	DSP	GLRA3	GLRA3	SOX2	GLRA3	KRT14		ISL1	HOXC4	GAS6	S1PR1	DGAT2	KRT14	LUM		MATN2	KCNJ16	MFRP	VSX1	MAFA
	HOXB2	HOXA2	GAS6	HAS3	GRHL3	MTOR	HOXA9	HOXC13	OXT		GALR1	HOXA5	HMX3	SFRP2	PKD1		TMOD1	HOXA2	HOXC11	S1PR1	FZD5	CPAMD8	CPAMD8	GAS6	HOXD1		PKD2L1	GRM2	GPR17	GAS6	GRM2	GRM2	TLX3	GRM2	KRT18		MTOR	HOXB5	PDX1	RYR1	DUOXA1	KRT18	MFRP		NOV	KCNQ4	NR2E1	MAB21L2	CHAT
	HOXB3	HOXA3	HAPLN1	HTRA1	HOXA2	SCN4B	HOXB2	HOXC9	MTOR		GAS6	HOXB3	COL5A2	ONECUT1	BARX2		CPAMD8	HOXA3	HOXC9	RYR1	GAB2	LAMB2	LAMB2	GJC1	HOXD10		VSX2	GABRB1	GPR26	GJC1	GABRB1	GABRB1		GABRB1	KRT1		S1PR1	HOXC11	HTR2A	MYLPF	EXOC3L1	KRT1	NR2E1		NPPC	KCNS3	RBP4	MEIS1	PRKCG
	HOXD3	HOXA5	HAS3	ITGA2	HOXC13	SCN1B	HOXB3	HOXD10	SCN4B		GJC1	HOXD3	ATOH1	DLX1	SFRP2		LAMB2	HOXA5	HOXD10	CNTNAP1	GALR1	TSPAN12	TSPAN12	HOXB2	HOXD4		USH1G	HTR1E	GRM2	HOXB2	HTR1E	HTR1E		HTR1E	LHX2		RYR1	HOXC9	ISL1	NEB	C1QTNF12	ADAM9	RBP4		RUNX3	KLHL24	RDH5	MFRP	TCF7L2
	HOXC4	HOXA9	HTRA1	ITGB4	KCNQ4	RYR1	HOXD3	HOXD13	SCN1B		GLRA1	HOXC4	PAX8	TBR1	MATN3		TSPAN12	HOXA9	HOXD4	SCN8A	GAS6	MYOM2	MYOM2	HTR2A	HOXA7		ITPR3	HTR2A	GABRB1	HTR2A	HTR2A	HTR2A		HTR2A	PKD1		MYLPF	HOXD10	KCNS3	JPH2	FOXD1	UPK2	RDH5			OXT	RGR	MYOM1	HRH3
	HOXB5	HOXB2	ITGA2	ITGB7	KERA	MYLPF	HOXC4	HOXD4	RYR1		CTTN	PKD1	TSPAN12	ATOH1	COL12A1		MYOM2	HOXB2	HOXD8	P2RX1	PDX1	VSX1	VSX1	OXT	DLX1		IMPG1	KCNJ10	NSG2	OXT	KCNJ10	KCNJ10		KCNJ10	ADAM9		NEB	HOXD4	KISS1	HLF	GALR1	WNT4	RGR			MTOR	RGS16	NEUROD1	CHRNB3
	HOXC6	HOXB3	ITGB4	KAZALD1	LHX2	NEB	HOXB5	HOXD8	MYLPF		HTR2A	BARX2	CLRN1	GSX1	COL21A1		VSX1	HOXB3	HOXA7	ITPR3	HTR2A	GNGT1	GNGT1	MTOR	HOXA6		GUCY2F	KISS1	HTR1E	MTOR	KISS1	KISS1		KISS1	LDB2		JPH2	HOXA7	ADAM9	FLNB	PDX1	LBH	RGS16			SCN4B	RLBP1	NR2E1	MCTP1
	HOXC5	HOXD3	ITGB7	SFRP2	CTHRC1	SORBS1	HOXC6	HOXA7	NEB		IGFBP5	SFRP2	ZIC1	ISL2	ADAMTS12		GNGT1	HOXD3	PKD1	CHRNB4	ISL1	MAB21L2	MAB21L2	SCN4B	RBP4		KCNK4	OXT	HTR2A	SCN4B	OXT	OXT		OXT	RYR1		HLF	KCNQ4	OXT	SLC8A1	ISL1	ADAMTSL4	RLBP1			SCN1B	RPE65	PITX2	RIMS3
	HOXC10	HOXC4	KAZALD1	ADAMTSL4	PRDM16	TMOD1	HOXC5	SFRP2	SORBS1		ITGA2	MATN3	VSX1	IL23R	SCIN		MAB21L2	HOXC4	BARX2	CARTPT	KCNS3	MEIS1	MEIS1	SCN1B			LAMB2	CHAT	KISS1	SCN1B	CHAT	CHAT		CHAT	KRT23		FLNB	LBX1	PRKCG	MYOM2	KCNS3	ONECUT1	RPE65			HRH3	SFRP5	POU4F2	P2RX1
	HOXC11	HOXB5	LIPC	TNC	CHRDL1	P2RX1	HOXC10	HOXA6	TMOD1		KISS1	COL12A1	GNGT1	MNX1	LUM		MEIS1	HOXB5	SFRP2	KCNMB4	KISS1	MFRP	MFRP	BRS3			TECTA	PRKCG	GPR160	BRS3	PRKCG	PRKCG		PRKCG	COL5A2		SLC8A1	CTHRC1	TCF7L2	ZFPM2	KISS1	S1PR1	SFRP5			JPH2	SIX3	PPP1R13L	ILDR2
	HOXC13	HOXC6	SFRP2	COL28A1	USH1G	LMOD2	HOXC11	NEUROD1	P2RX1		OXT	COL21A1	MAFB	MYL2	MATN2		MFRP	HOXC10	CHAD	SLC8A1	ADAM9	MYOM1	MYOM1	RYR1			CNR1	MTOR	OXT	RYR1	MTOR	MTOR		MTOR	FLNB		MYOM2	USH1G	HRH3	MEIS1	MAFA	KRT23	SIX3			KCNQ5	SIX6	RBP4	ITPR3
	HOXC9	HOXC5	ADAMTSL4	COL9A3	DLX1	CHRNB4	HOXC13	NR2F2	TRPC3		TYMP	ADAMTS12	MEIS1	NEUROD1	NOV		MYOM1	HOXC11	FREM1	NPPC	OXT	NEUROD1	NEUROD1	SGCZ			CLRN1	SCN1B	CHRM5	SGCZ	SCN1B	SCN1B		SCN1B	KRT80		ZFPM2	HMX3	VTCN1	MYBPC1	CHAT	RILPL1	SIX6			GRIN3B		RPE65	CHRNB4
	HOXD10	HOXC10	TNC	COL5A2	BCAR3	SLC8A1	HOXC9	OTX2	LMOD2		MAG	SCIN	MFRP	NR2E1	NPPC		NEUROD1	HOXC9	MATN3		PRKCG	NR2E1	NR2E1	P2RX1			VSX1	CHRM5	BRS3	P2RX1	CHRM5	CHRM5		CHRM5	SCEL		MEIS1	ATOH1	CHRNB3	MYL2	TCF7L2	FLNB				SCN8A		SERPINF1	CARTPT
	HOXD13	HOXC11	COL28A1	VCAN	HMX3	MYOM2	HOXD10	SIX3	CHRNB4		MTOR	LUM	PITX2	NR2F2	RSPO2		NR2E1	HOXD10	COL12A1		TCF7L2	PITX2	PITX2	ITPR3			COL18A1	HRH3	S1PR1	ITPR3	HRH3	HRH3		HRH3	PRKCH		MYBPC1	PAX8	MCTP1	MYOM1	WNT4	ATOH1				P2RX1		SIX3	KCNMB4
	HOXD4	HOXC9	COL9A3	ANTXR1	COL5A2	MYBPC1	HOXD13	TBX18	MYOC		SCN4B	MATN2	PRDM1	OLIG3	RUNX3		PITX2	PDX1	COL21A1		HRH3	POU4F2	POU4F2	CARTPT			LUM	NPTX2	HRH3	CARTPT	NPTX2	NPTX2		NPTX2	RUNX1		MYL2	CLRN1	RIMS3	NKX2-6	ILDR2	TMOD1				TRPC3		SLC4A5	CAMK2A
	HOXD8	HOXD1	COL5A2	LAMB2	ATOH1	MYH4	HOXD4	WT1	SLC8A1		SCN1B	NOV	RBP4	PRDM1	STC1		POU4F2	HOXD13	HOXA6		VTCN1	PPP1R13L	PPP1R13L	KCNMB4			MBP	CHRNB3	RGS11	KCNMB4	CHRNB3	CHRNB3		CHRNB3	TFAP2B		MYOM1	ZIC1	P2RX1	NR2F2	ITPR3	KRT80				P2RX5		SOX1	PAX8
	HOXA7	HOXD10	VCAN	MATN3	TMOD1	MYL1	HOXD8		MYOM2		RYR1	NPPC	RPE65	PRDM14			PPP1R13L	HOXD4	MATN2		CHRNB3	PRDM1	PRDM1	SLC8A1			MFRP	MCTP1	GPR142	SLC8A1	MCTP1	MCTP1		MCTP1			NKX2-6	HOXA6	ITPR3	PDLIM5	CRABP1	SCEL				CAMK2A		TFAP2B	SYT1
	ISL1	HOXD13	ANTXR1	COL12A1	PAX8	MYL2	HOXA7		MYBPC1		NPTX2	POU4F2	SIX3	SOX1			PRDM1	HOXA7	NPPC		MCTP1	RBP4	RBP4	CNR1			NOV	SV2C	NPBWR2	CNR1	SV2C	SV2C		SV2C			NR2F2	MAFB	RPH3AL	POPDC3	DUOX1	PAX8				SYT1		THY1	SYT12
	LHX2	HOXA13	LAMB2	ADAMTS3	CPAMD8	MYOM1	ISL1		MYH4		P2RX1	RSPO2	SOX1	SOX2			RBP4	ITGA2	SP5		RIMS3	RPE65	RPE65	MYL1			NPFF	RIMS3	PROK1	MYL1	RIMS3	RIMS3		RIMS3			PDLIM5	NEUROD1	CHRNB4	PPP1R13L	CARTPT	LAMB2				KCNK4		TSKU	CACNA1E
	SFRP2	HOXD4	MATN3	COL18A1	LAMB2	NPNT	LBX1		MYL1		TRPC3	RUNX3	TFAP2B	TLX3			RPE65	ITGB4	STC1		P2RX1	SERPINF1	SERPINF1	MYL2			NPY1R	P2RX1	NPY4R	MYL2	P2RX1	P2RX1		P2RX1			POPDC3	RBP4	CARTPT	PPP3CA	PAX8	CLRN1				GNB5		WT1	CNR1
	DLX1	HOXD8	COL12A1	LOX	TSPAN12	PPP1R13L	LHX2		MYL2		ITPR3	STC1	THY1	WT1			SEMA3A	KCNQ4			ITPR3	SIX3	SIX3	NPFF			NR2E1	P2RX5	ADCY4	NPFF	P2RX5	P2RX5		P2RX5			PPP1R13L	SIX3	KCNMB4	RBP4	CACNA1E	FZD1				SYT12			NEUROD1
	TBR1	HOXA7	ADAMTS3	LUM	MYOM2	SMTN	SFRP2		MYOM1		CHRNB4	WT1	TSKU				SERPINF1	LBX1			RPH3AL	SIX6	SIX6	NPPC			OPRD1	ITPR3	ITPR3	NPPC	ITPR3	ITPR3		ITPR3			PPP3CA		CAMK2A	SMYD1	CNR1	COL18A1				CACNA1E			NOV
	SP8	PKD1	COL18A1	MMP11	CLRN1	SNTB1	DLX1		NPNT		CARTPT						SIX3	LHX2			CHRNB4	SLC4A5	SLC4A5	NPY1R			OTOS	GABRG3	RPH3AL	NPY1R	GABRG3	GABRG3		GABRG3			RBP4		PAX8	WT1	GCNT4	NEUROD1				KCNK12			NPFF
	PAX8	BARX2	LOX	NPNT	ZIC1	STC1	TBR1		P2RY1		KCNMB4						SIX6	CTHRC1			CARTPT	SOX1	SOX1	NR2F2			P2RY1	CHRNB4	GABRG3	NR2F2	CHRNB4	CHRNB4		CHRNB4			SMYD1		SYT1	SGCB	RBP1	NEUROG3				SLC8A1			P2RY1
	HOXA6	SFRP2	LUM	NR2E1	VSX1	TACR3	SP8		PDLIM5		SLC8A1						SLC4A5	WNT4			KCNMB4	SOX2	SOX2	NTS			PNOC	CARTPT	ADGRE1	NTS	CARTPT	CARTPT		CARTPT			WT1		SYT12	YBX3	NEUROD1	NR2F2				CNR1			PPP3CA
	MAFB	RYR1	SDCBP	FN1	GNGT1	TRPV1	PAX8		PPP1R13L		MYL2						SOX1	SFRP2			CAMK2A	TFAP2B	TFAP2B	P2RY1			POU4F2	KCNMB4	CARTPT	P2RY1	KCNMB4	KCNMB4		KCNMB4			SGCB		CACNA1E	KLF5	NOV	NR5A2				AHNAK			NR1D1
	NEUROD1	CHAD	MMP11	PTX3	MAB21L2	UTS2	ZIC1		PPP3CA		NEUROD1						SOX2	USH1G			PAX8	THY1	THY1	P2RY2			PPEF1	CAMK2A	LPAR4	P2RY2	CAMK2A	CAMK2A		CAMK2A			YBX3		CNR1		NPFF	PCK1				NKAIN3			RBP4
	NR2F2	DLX1	NPNT	SH3PXD2A	MAFB	ZC3H12A	HOXA6		SMTN		NOV						TFAP2B	HMX3			SYT1	TSKU	TSKU	PPP1R13L			RBP4	SLC6A5	GUCY2F	PPP1R13L	SLC6A5	SLC6A5		SLC6A5			KLF5		MBP		P2RY1	PITX2				LRRC38			SLC18A3
	OTX2	COL5A2	NR2E1	WT1	MEIS1		MAFB		SNTB1		NPFF						THY1	SP8			SYT12	WT1	WT1	RNPEP			RDH5	SYT1	CAMK2A	RNPEP	SYT1	SYT1		SYT1					SDCBP		PPP3CA	POF1B				NPY5R			SLC6A9
	PITX2	FREM1	PLTP	DDR2	MFRP		NEUROD1		STC1		NPNT						TSKU	COL5A2			CACNA1E			SEMA3A			RGR	SYT12	PAX8	SEMA3A	SYT12	SYT12		SYT12					MYOM1		NR1D1	PRDM1				OPRD1			SNCG
	SEMA3A	SHOX	FN1		MYOM1		NR2F2		TACR3		NPPC						WT1	ATOH1			CNR1			SLC4A5			RGS16	SLC1A2	GPR52	SLC4A5	SLC1A2	SLC1A2		SLC1A2					NEUROD1		RBP4	PRKCH				P2RY1			SYT2
	SIX3	MYOC	PTX3		NEUROD1		OTX2		TRPV1		OPRD1							PAX8			SCIN			STAT1			RLBP1	CACNA1E	GNB5	STAT1	CACNA1E	CACNA1E		CACNA1E					NOV		RDH5	RHCG				PLCG2			TFAP2B
	SOX1	MATN3	SCARB1		NKX2-6		PITX2		UTS2		PPP3CA							CLRN1			MBP			STC1			RPE65	CNR1	SSTR3	STC1	CNR1	CNR1		CNR1					NPFF		RPE65	RUNX1				RAB3B			VAMP8
	TBX18	COL12A1	SH3PXD2A		NR2E1		SEMA3A		ZC3H12A		SEMA3A							ZIC1			SDCBP			TACR3			SFRP5	MBP	CNR1	TACR3	MBP	MBP		MBP					NPY5R		SCARB1	SIX3				REM2
	WT1	COL21A1	WT1		PITX2		SIX3				SHANK2							COL12A1			MYOM1			UTS2			SIX3	SDCBP	FZD1	UTS2	SDCBP	SDCBP		SDCBP					P2RY1		SLCO4A1	SLC4A5				RRAD
		ADAMTS12	DDR2		POU4F2		SOX1				SOX10							FZD1			NEUROD1			UTS2B			SIX6	NPFF	GNGT1	UTS2B	NPFF	NPFF		NPFF					PPP3CA		TFAP2B	STAT1				SHANK2
		SCIN			PPP1R13L		STC1				MTG1							HOXA6			NOV			ZC3H12A			TRPA1	NPY5R	MC5R	ZC3H12A	NPY5R	NPY5R		NPY5R					FN1		VAMP8	STC1				SNCG
		HOXA6			PRDM1		TBX18				STC1							MAB21L2			NPFF						TRPV1	NR2E1	MCF2		NR2E1	NR2E1		NR2E1					RAB3B			TFCP2L1				STC1
		LUM			RBP4		WT1				TACR3							MAFB			NPY5R							P2RY1	MCHR2		P2RY1	P2RY1		P2RY1					RAB3D			WT1				STOM
		MATN2			RPE65						TLX3							MBP			P2RY1							PMCH	MRAP2		PMCH	PMCH		PMCH					NR1D1			KLF5				SYT2
		MEIS1			SERPINF1						TRPV1							NEUROD1			P2RY2							PNOC	NPB		PNOC	PNOC		PNOC					RBP4							TF
		NOV			SIX3						TSHZ3							OTX2			PPP3CA							PPP3CA	NPFF		PPP3CA	PPP3CA		PPP3CA					SNCG							THY1
		NPPC			SIX6						HGF							FN1			FN1							PRR7	NPFFR1		RAB3B	RAB3B		RAB3B					STXBP6							TRPV3
		PLS3			SLC4A5						ZC3H12A							RBP4			RAB3B							RAB3B	NPY1R		RASD2	RASD2		RASD2					SYT2							VAMP8
		PITX2			SOX1													RSPO2			RAB3D							RASD2	NPY5R		SCGN	SCGN		SCGN					TFAP2B
		RBP4			SOX2													SIX3			NR1D1							SCGN	NTS		SHANK2	SHANK2		SHANK2					VAMP8
		RSPO2			TFAP2B													SOX2			RBP4							SHANK2	NXPH3		SLC18A3	SLC18A3		SLC18A3					ZC3H12A
		RUNX3			THY1													SP9			SNCG							SLC18A3	OPRD1		SLC6A9	SLC6A9		SLC6A9
		SP5			TSKU																STC1							SLC6A9	P2RY1		SNCG	SNCG		SNCG
		STC1			WT1																STXBP6							SNCG	P2RY2		SYT2	SYT2		SYT2
																					SYT2							SYT2	PIK3R6		TRPV1	TRPV1		TRPV1
																					TFAP2B							TRPV1	PMCH		TSHZ3	TSHZ3		TSHZ3
																					TRPV1							TSHZ3	PNOC		UTS2	UTS2		UTS2
																					VAMP8							UTS2	PPEF1		TPGS1	TPGS1		TPGS1
																					ZC3H12A							TPGS1	PTH2R
																													RGR
																													RGS16
																													TACR3
																													UTS2
																													UTS2B
[truncated: 91 more columns]

## Sheet: 46_HBvSC_GO_BP
ID	GO:0007268	GO:0098916	GO:0099537	GO:0099536	GO:0048598	GO:0042445	GO:0001523	GO:0042573	GO:0010817	GO:0016101	GO:0006721	GO:0030198	GO:0007186	GO:0044057	GO:0043062	GO:0006720	GO:0034754	GO:0007423	GO:0001505	GO:0060322	GO:0007610	GO:0007600	GO:0007601	GO:0050953	GO:0030199	GO:0007420	GO:0033993	GO:0001101	GO:0001501	GO:0003002	GO:0032526	GO:0007271	GO:0071542	GO:0043588	GO:0071300	GO:0071229	GO:0008544	GO:0006836	GO:0048384	GO:0051046	GO:0023061	GO:0048385	GO:0019226	GO:0030901	GO:0042391	GO:0030900	GO:0061564	GO:0048705	GO:0060541
Description	chemical synaptic transmission	anterograde trans-synaptic signaling	trans-synaptic signaling	synaptic signaling	embryonic morphogenesis	hormone metabolic process	retinoid metabolic process	retinoic acid metabolic process	regulation of hormone levels	diterpenoid metabolic process	terpenoid metabolic process	extracellular matrix organization	G protein-coupled receptor signaling pathway	regulation of system process	extracellular structure organization	isoprenoid metabolic process	cellular hormone metabolic process	sensory organ development	regulation of neurotransmitter levels	head development	behavior	sensory perception	visual perception	sensory perception of light stimulus	collagen fibril organization	brain development	response to lipid	response to acid chemical	skeletal system development	regionalization	response to retinoic acid	synaptic transmission, cholinergic	dopaminergic neuron differentiation	skin development	cellular response to retinoic acid	cellular response to acid chemical	epidermis development	neurotransmitter transport	retinoic acid receptor signaling pathway	regulation of secretion	signal release	regulation of retinoic acid receptor signaling pathway	transmission of nerve impulse	midbrain development	regulation of membrane potential	forebrain development	axon development	skeletal system morphogenesis	respiratory system development
GeneRatio	32/202	32/202	32/202	32/202	28/202	16/202	10/202	6/202	25/202	10/202	10/202	18/202	30/202	23/202	19/202	10/202	10/202	23/202	18/202	29/202	24/202	21/202	13/202	13/202	7/202	27/202	28/202	16/202	21/202	16/202	9/202	5/202	6/202	13/202	7/202	12/202	14/202	14/202	5/202	24/202	19/202	4/202	7/202	8/202	17/202	17/202	20/202	13/202	11/202
BgRatio	420/8514	420/8514	423/8514	425/8514	354/8514	125/8514	44/8514	8514-11-01	310/8514	48/8514	51/8514	190/8514	468/8514	311/8514	223/8514	62/8514	62/8514	330/8514	218/8514	491/8514	362/8514	292/8514	125/8514	127/8514	33/8514	461/8514	495/8514	196/8514	316/8514	199/8514	65/8514	16/8514	26/8514	142/8514	39/8514	123/8514	165/8514	169/8514	18/8514	418/8514	290/8514	8514-10-01	43/8514	58/8514	245/8514	246/8514	322/8514	155/8514	114/8514
pvalue	3.42809e-09	3.42809e-09	4.08591e-09	4.58871e-09	1.63509e-08	3.56742e-08	5.55893e-08	6.93247e-08	7.07385e-08	1.34902e-07	2.47691e-07	5.22938e-07	5.26783e-07	1.14169e-06	1.27924e-06	1.66051e-06	1.66051e-06	3.15856e-06	3.86216e-06	4.34854e-06	4.54268e-06	5.35065e-06	7.61233e-06	9.07041e-06	9.64894e-06	1.12526e-05	1.45854e-05	1.57054e-05	1.8033e-05	1.89942e-05	2.01739e-05	2.52564e-05	2.56451e-05	3.03684e-05	3.07889e-05	3.28171e-05	3.52765e-05	4.60173e-05	4.76584e-05	4.9659e-05	5.59448e-05	5.77495e-05	5.95231e-05	6.05205e-05	6.88539e-05	7.24359e-05	7.49936e-05	7.59954e-05	7.76915e-05
p.adjust	2.97463e-06	2.97463e-06	2.97463e-06	2.97463e-06	8.47958e-06	1.54172e-05	2.03806e-05	2.03806e-05	2.03806e-05	3.49801e-05	5.83875e-05	0.000105073	0.000105073	0.000211457	0.000221137	0.000253277	0.000253277	0.000455008	0.000527083	0.000560912	0.000560912	0.000630647	0.000858208	0.000979982	0.00100079	0.00112223	0.00140074	0.00145443	0.0016124	0.00164173	0.00168745	0.00201508	0.00201508	0.00228102	0.00228102	0.00236375	0.00247221	0.00314008	0.00316867	0.00321915	0.00353817	0.00356534	0.00356658	0.00356658	0.00396751	0.00408318	0.00410533	0.00410533	0.00411131
qvalue	2.50809e-06	2.50809e-06	2.50809e-06	2.50809e-06	7.14965e-06	1.29992e-05	1.71841e-05	1.71841e-05	1.71841e-05	2.94938e-05	4.923e-05	8.85934e-05	8.85934e-05	0.000178292	0.000186454	0.000213553	0.000213553	0.000383645	0.000444416	0.000472939	0.000472939	0.000531737	0.000723607	0.000826282	0.000843825	0.00094622	0.00118105	0.00122632	0.00135951	0.00138424	0.00142279	0.00169904	0.00169904	0.00192327	0.00192327	0.00199302	0.00208447	0.00264759	0.0026717	0.00271426	0.00298325	0.00300616	0.0030072	0.0030072	0.00334525	0.00344278	0.00346146	0.00346146	0.00346649
Genes	ACHE	ACHE	ACHE	ACHE	ALDH1A2	ACHE	ALDH1A2	ALDH1A2	ACHE	ALDH1A2	ALDH1A2	CDH1	AVP	AQP1	CDH1	ALDH1A2	ALDH1A2	ACHE	ACHE	ALDH1A2	AVP	BARHL1	CLDN19	CLDN19	COL11A1	ALDH1A2	ALDH1A2	ALDH1A2	COL11A1	ALDH1A2	ALDH1A2	ACHE	FOXA1	CNFN	ALDH1A2	ALDH1A2	CNFN	AQP1	ALDH1A2	ACHE	BAIAP3	CRABP2	AVP	BARHL1	CHRNA2	ALDH1A2	BARHL2	COL11A1	ALDH1A2
	BAIAP3	BAIAP3	BAIAP3	BAIAP3	COL11A1	ALDH1A2	CRABP2	CRABP2	ALDH1A2	CRABP2	CRABP2	COL11A1	AVPR1A	AVP	COL11A1	CRABP2	CRABP2	ALDH1A2	BAIAP3	AQP1	AVPR1A	CLDN19	COL11A1	COL11A1	COL2A1	AQP1	AQP1	AQP1	COL2A1	CYP26B1	AQP1	CHRNA5	SFRP2	COL3A1	AQP1	AQP1	CRABP2	BAIAP3	CRABP2	AQP1	CHRNA5	CYP26A1	AVPR1A	CNP	CHRNA5	AQP1	CNP	COL2A1	CTGF
	CDH1	CDH1	CDH1	CDH1	COL2A1	BACE2	CYP26A1	CYP26A1	BACE2	CYP26A1	CYP26A1	COL2A1	BAIAP3	AVPR1A	COL2A1	CYP26A1	CYP26A1	COL11A1	CHRNA5	AVPR1A	CHRNA5	COL11A1	COL2A1	COL2A1	COL3A1	AVPR1A	AVP	AVPR1A	COL3A1	DMRT3	CYP26A1	COLQ	SFRP1	COL5A1	CYP26B1	AVPR1A	CTGF	CHRNA5	CYP26A1	AVP	CRHBP	CYP26B1	CLDN19	FZD6	CLDN19	AVPR1A	CRABP2	CSGALNACT1	FOXA1
	CHRNA2	CHRNA2	CHRNA2	CHRNA2	COL5A1	COLQ	CYP26B1	CYP26B1	BAIAP3	CYP26B1	CYP26B1	COL3A1	BDKRB2	BDKRB2	COL3A1	CYP26B1	CYP26B1	COL2A1	COLQ	BARHL1	CNP	COL2A1	DHRS3	DHRS3	COL5A1	BARHL1	AVPR1A	BCL11A	CSGALNACT1	FOXA1	CYP26B1	CHRNB4	NR4A2	CYP26B1	SLC6A4	BCL11A	CYP26B1	CHAT	CYP26B1	AVPR1A	GRP	DHRS3	DMRT3	SFRP2	CNIH2	CDH1	EMB	CTGF	HHIP
	CHRNA5	CHRNA5	CHRNA5	CHRNA5	CRABP2	CRABP2	DHRS3	RBP1	COLQ	DHRS3	DHRS3	COL5A1	FRMPD1	CNIH2	COL5A1	DHRS3	DHRS3	COL5A1	CHAT	CDH1	CRHBP	DHRS3	EFEMP1	EFEMP1	SFRP2	CDH1	CNP	COL3A1	CTGF	HHIP	SLC6A4	CHRNA7	OTX2	DSP	EPHA3	COL3A1	DSP	PRKCG	DHRS3	BAIAP3	KCNS3		MAG	SFRP1	DSP	CNP	LHX2	CYP26B1	IGFBP5
	CNIH2	CNIH2	CNIH2	CNIH2	CYP26B1	CRHBP	RBP1	RDH10	CRABP2	RBP1	RBP1	COL8A2	FZD6	CRHBP	COL8A2	RBP1	WNT4	COL8A2	PRKCG	CNP	DMRT3	EFEMP1	GJC1	GJC1	ADAMTS3	CNP	CRHBP	CTGF	CYP26B1	HOXA9	EPHA3		PHOX2B	FST	SERPINF1	CYP26B1	FST	SV2C		C1QTNF4	MAFA		GLRA1	MBP	GJC1	COL3A1	LHX9	DHRS3	LOX
	CNP	CNP	CNP	CNP	EFEMP1	CYP26A1	RBP4		CRHBP	RBP4	RBP4	COLQ	VIPR1	CTGF	COLQ	RBP4	RBP1	CYP26B1	RIMS3	COL2A1	GRM1	GJC1	GLRA1	GLRA1	LOX	COL3A1	CTGF	CYP26A1	DHRS3	HOXC5	RBP4			FZD6	TNC	SLC6A4	FZD6	RIMS3		CHRNA5	CHAT		CHRNB4	NR4A2	GLRA3	LHX2	MAG	RFLNB	PHOX2B
	COLQ	COLQ	COLQ	COLQ	FZD6	CYP26B1	RDH10		CYP26A1	RDH10	RDH10	CSGALNACT1	GLRA3	DSP	CSGALNACT1	RDH10	RBP4	EFEMP1	SLC6A4	COL3A1	GRP	GRM1	CLRN1	CLRN1		FZD6	CYP26A1	CYP26B1	EFEMP1	HOXC6	SERPINF1			IGFBP5		EPHA3	IGFBP5	SLC6A4		CRHBP	PRKCG			OTX2	GRM1	WNT4	ATOH1	HHIP	RBP4
	CRHBP	CRHBP	CRHBP	CRHBP	HOXA9	DHRS3	RDH5		CYP26B1	RDH5	RDH5	CTGF	GPR17	GJC1	CTGF	RDH5	RDH10	FZD6	TPH2	FZD6	PRKCG	KCNQ4	RBP4	RBP4		LHX2	CYP26B1	GLRA3	RFLNB	LHX2	TNC			ITGB4		GLRA1	KRT18	TRPC4		GRP	SSTR5				KCNT1	ATOH1	EPHA3	SFRP2	RDH10
	GJC1	GJC1	GJC1	GJC1	ITGB4	FOXA1	STRA6		DHRS3	STRA6	STRA6	HAS3	GRM1	GRM1	HAS3	STRA6	RDH5	KCNQ4	CHRNB4	LHX2	BRS3	GLRA1	RDH10	RDH10		WNT4	FOXA1	SLC6A4	HHIP	SFRP2				KRT18		SFRP1	LHX2	CHRNB4		KCNS3	RIMS3				RIMS3	OTP	CCKAR	HOXC4	STRA6
	GLRA3	GLRA3	GLRA3	GLRA3	KCNQ4	CHAT			FOXA1			ITGB4	GRM2	IGFBP5	ITGB4			LHX2	SLC1A7	WNT4	NEUROD2	TECTA	RDH5	RDH5		SFRP2	HPGD	EPHA3	HOXA9	HOXC4				LHX2		SERPINF1	ATOH1	SLC1A7		PRKCG	CCKAR				GLRA1	CCKAR	GFRA2	SFRP1	TNC
	GRM1	GRM1	GRM1	GRM1	LHX2	WNT4			GRP			SFRP2	GRP	MAG	LCAT			ATOH1	SYT12	SFRP2	SLC6A4	CLRN1	RGS16	RGS16		NEUROD2	NR6A1	GLRA1	HOXC5	SFRP1				PRKCH		TNC	CLRN1	SYT12		SSTR5	CHRNB4				CHRNB4	SSTR3	NEFH	HOXA6
	GRM2	GRM2	GRM2	GRM2	WNT4	RBP1			KCNS3			HAPLN1	HPGD	GLRA1	SFRP2			CPAMD8	PRIMA1	NEUROD2	CCKAR	CHRNA7	SFRP5	SFRP5		ATOH1	PAPPA	SFRP1	HOXC6	HOXA6				SOX21			PRKCH	SLC18A3		RIMS3	SFRP1				KCNH8	NEUROD1	NR4A2	RDH10
	CHAT	CHAT	CHAT	CHAT	SFRP2	RBP4			MAFA			VCAN	GPR26	CHRNB4	HAPLN1			CLRN1	RORA	ATOH1	GLRA1	MBP				OTP	SSTR5	RBP4	SFRP2	NEUROD1							SOX21	SLC6A9		SLC6A4	SYT12				CHRNA7	NEUROG3	NTNG2
	PRKCG	PRKCG	PRKCG	PRKCG	HOXC4	RDH10			CHAT			ADAMTS3	BRS3	CHRNA7	VCAN			MAB21L2	SDS	OTP	CHRNB4	RBP4				SLC6A4	SLC6A4	SERPINF1	HOXC4	OTX2										CCKAR	NEUROD1				SCN4B	NKX2-6	OTX2
	NEUROD2	NEUROD2	NEUROD2	NEUROD2	ATOH1	RDH5			WNT4			LOX	SSTR5	NEUROD1	ADAMTS3			NEUROD1	SLC18A3	SLC6A4	CHRNA7	RDH10				CCKAR	EPHA3	TNC	SHOX	TBX20										CHRNB4	RBP4				TRPV1	NR4A2	PHOX2B
	SV2C	SV2C	SV2C	SV2C	SFRP1				SSTR5			NPNT	CCKAR	NPNT	LOX			NKX2-6	SLC6A9	CCKAR	NR4A2	RDH5				SFRP1	TPH2		SFRP1											SFRP1	SLC18A3				PANK2	OTX2	SEMA3B
	RIMS3	RIMS3	RIMS3	RIMS3	CLRN1				CCKAR			TNC	GLRA1	PARP2	NPNT			PHOX2B	TRPV1	SFRP1	PRLH	RGS16				SSTR3	SFRP1		HOXA6											SYT12	SLC6A9						TNC
	SLC6A4	SLC6A4	SLC6A4	SLC6A4	SOX7				SFRP1				SSTR3	PHOX2B	TNC			PPP1R13L		SSTR3	RASD2	SFRP5				MBP	SSTR3		RBP4											MBP	VIP						SPON2
	GLRA1	GLRA1	GLRA1	GLRA1	HOXA6				RBP1				ARHGEF26	SCN4B				RBP4		MBP	SERPINF1	TRPV1				NEUROD1	LOX		RDH10											NEUROD1							TSPAN2
	CHRNB4	CHRNB4	CHRNB4	CHRNB4	MAB21L2				NEUROD1				NPBWR1	TACR3				RDH10		NEUROD1	STRA6	VIP				NEUROG3	NR2F1		SCIN											RBP4
	SYT12	SYT12	SYT12	SYT12	MBP				RBP4				NPB	TRPV1				SERPINF1		NEUROG3	TACR3					NKX2-6	NR4A2													SCIN
	NPBWR1	NPBWR1	NPBWR1	NPBWR1	NEUROD1				RDH10				NXPH3	VIP				STRA6		NKX2-6	TRPV1					NR4A2	RBP4													TRPV1
	CHRNA7	CHRNA7	CHRNA7	CHRNA7	OTX2				RDH5				PRLH							NR4A2	VIP					OTX2	RORA													VIP
	MBP	MBP	MBP	MBP	RBP4				VIP				PTH2R							OTX2						PHOX2B	SERPINF1
	NTNG2	NTNG2	NTNG2	NTNG2	RDH10								RGS16							PHOX2B						RORA	TACR3
	RASD2	RASD2	RASD2	RASD2	STRA6								TACR3							RORA						TSPAN2	TNC
	SCGN	SCGN	SCGN	SCGN	TBX20								UTS2							STRA6							SPON2
	SLC18A3	SLC18A3	SLC18A3	SLC18A3									UTS2B							TSPAN2
	SLC6A9	SLC6A9	SLC6A9	SLC6A9									VIP
	TRPV1	TRPV1	TRPV1	TRPV1
	UTS2	UTS2	UTS2	UTS2
[truncated: 16 more columns]
